1 **Computational identification and experimental characterization of**  
2 **preferred downstream positions in human core promoters**

3

4

5 René Dreos<sup>1,¶, #a</sup>, Nati Malachi<sup>2,¶</sup>, Anna Sloutskin<sup>2,¶</sup>, Philipp Bucher<sup>1,3,\*</sup> and Tamar  
6 Juven-Gershon<sup>2,\*</sup>

7

8

9 <sup>1</sup> Swiss Institute of Bioinformatics (SIB), Lausanne, Switzerland

10 <sup>2</sup> The Mina and Everard Goodman Faculty of Life Sciences, Bar-Ilan University,  
11 Ramat-Gan, Israel

12 <sup>3</sup> School of Life Sciences, Swiss Federal Institute of Technology, Lausanne,  
13 Switzerland

14 <sup>#a</sup> Current address: Center for Integrative Genomics, University of Lausanne, CH-  
15 1015 Lausanne, Switzerland.

16

17

18 \* Corresponding authors

19 E-mail: [tamar.gershon@biu.ac.il](mailto:tamar.gershon@biu.ac.il) (TJG)

20 E-mail: [philipp.bucher@sib.swiss](mailto:philipp.bucher@sib.swiss) (PB)

21

22

23 ¶ These authors contributed equally to this work.

## 24 **Abstract**

25 Metazoan core promoters, which direct the initiation of transcription by RNA  
26 polymerase II (Pol II), may contain short sequence motifs termed core promoter  
27 elements/motifs (e.g. the TATA box, initiator (Inr) and downstream core promoter  
28 element (DPE)), which recruit Pol II via the general transcription machinery. The  
29 DPE was discovered and extensively characterized in *Drosophila*, where it is strictly  
30 dependent on both the presence of an Inr and the precise spacing from it. Since the  
31 *Drosophila* DPE is recognized by the human transcription machinery, it is most likely  
32 that some human promoters contain a downstream element that is similar, though  
33 not necessarily identical, to the *Drosophila* DPE. However, only a couple of human  
34 promoters were shown to contain a functional DPE, and attempts to computationally  
35 detect human DPE-containing promoters have mostly been unsuccessful. Using a  
36 newly-designed motif discovery strategy based on Expectation-Maximization  
37 probabilistic partitioning algorithms, we discovered preferred downstream positions  
38 (PDP) in human promoters that resemble the *Drosophila* DPE. Available chromatin  
39 accessibility footprints revealed that *Drosophila* and human Inr+DPE promoter  
40 classes are not only highly structured, but also similar to each other, particularly in  
41 the proximal downstream region. Clustering of the corresponding sequence motifs  
42 using a neighbor-joining algorithm strongly suggests that canonical Inr+DPE  
43 promoters could be common to metazoan species. Using reporter assays we  
44 demonstrate the contribution of the identified downstream positions to the function of  
45 multiple human promoters. Furthermore, we show that alteration of the spacing  
46 between the Inr and PDP by two nucleotides results in reduced promoter activity,  
47 suggesting a strict spacing dependency of the newly discovered human PDP on the  
48 Inr. Taken together, our strategy identified novel functional downstream positions

49 within human core promoters, supporting the existence of DPE-like motifs in human  
50 promoters.

51

## 52 **Author summary**

53 Transcription of genes by the RNA polymerase II enzyme initiates at a genomic  
54 region termed the core promoter. The core promoter is a regulatory region that may  
55 contain diverse short DNA sequence motifs/elements that confer specific properties  
56 to it. Interestingly, core promoter motifs can be located both upstream and  
57 downstream of the transcription start site. Variable compositions of core promoter  
58 elements have been identified. The initiator (Inr) motif and the downstream core  
59 promoter element (DPE) is a combination of elements that has been identified and  
60 extensively characterized in fruit flies. Although a few Inr+DPE -containing human  
61 promoters have been identified, the presence of transcriptionally important  
62 downstream core promoter positions within human promoters has been a matter of  
63 controversy in the literature. Here, using a newly-designed motif discovery strategy,  
64 we discovered preferred downstream positions in human promoters that resemble  
65 fruit fly DPE. Clustering of the corresponding sequence motifs in eight additional  
66 species indicated that such promoters could be common to multicellular non-plant  
67 organisms. Importantly, functional characterization of the newly discovered preferred  
68 downstream positions supports the existence of Inr+DPE-containing promoters in  
69 human genes.

70

## 71 **Introduction**

72 Regulation of eukaryotic gene expression is critical for diverse biological processes,  
73 including embryonic development, differentiation, cell cycle progression and

74 apoptosis. Cellular signals that regulate gene expression affect many different  
75 factors and co-regulators, but the ultimate decision whether or not to initiate  
76 transcription occurs at the core promoter. The core promoter, which lies at the heart  
77 of transcription, is generally defined as the minimal region that directs the accurate  
78 initiation of transcription by RNA polymerase II (Pol II) [1-5].

79 There are three major modes of transcription initiation patterns: focused,  
80 dispersed and mixed [1-3, 5-9]. Focused (also termed “sharp”) promoters  
81 encompass from -40 to +40 relative to the transcription start site (TSS; referred to as  
82 +1), and contain a single predominant TSS or a few TSSs within a narrow region of  
83 several nucleotides. Focused transcription initiation is associated with  
84 spatiotemporally regulated genes. Because of the biological significance of regulated  
85 genes, focused initiation is the most studied mode of transcription initiation.  
86 Dispersed (also termed “broad”) promoters contain multiple weak start sites that  
87 span over 50 to 100 nucleotides. Dispersed transcription initiation is associated with  
88 constitutive or housekeeping genes. Mixed (also termed “broad with peak”)   
89 promoters combine the abovementioned modes by exhibiting a dispersed initiation  
90 pattern with a single strong transcription start site.

91 Interestingly, although the core promoter was previously regarded as a universal  
92 component of the transcription machinery, it is nowadays clear that core promoters  
93 differ both in their architecture and function [1, 3, 5, 10-12]. In addition, the core  
94 promoter composition was demonstrated to affect transcriptional output, thus  
95 demonstrating the regulatory role of the promoter sequence itself [13-16].

96 Metazoan focused core promoters may contain short DNA sequences termed  
97 core promoter elements/motifs. These motifs, such as the TFIID-bound elements  
98 TATA box, initiator (Inr), downstream core promoter element (DPE), motif ten

99 element (MTE) and the Bridge configuration, function as recognition sites for the  
100 basal transcription machinery that recruits Pol II and have a positional bias (reviewed  
101 in [1-5, 17, 18]). The function of the DPE, MTE and Bridge downstream motifs is  
102 exclusively dependent on a strictly-spaced functional Inr motif [19-22].

103 The DPE, MTE and Bridge motifs were discovered and extensively characterized  
104 in *Drosophila melanogaster* promoters [16, 19-32]. Although the conservation of the  
105 DPE and MTE from *Drosophila* to humans was demonstrated, only a few human  
106 promoters were shown to be dependent on a functional DPE strictly located at  
107 positions +28 to +32, relative to the A<sub>+1</sub> of the Inr [20, 33, 34], and one review article  
108 even postulated that the DPE may be unique to *Drosophila* [3]. Nevertheless, as fruit  
109 flies are evolutionarily distant from humans, it is very likely that some human  
110 promoters contain a downstream core promoter element that is similar, but not  
111 identical to, *Drosophila* DPE.

112 TFIID is the first basal transcription factor that binds the core promoter and  
113 recruits Pol II and other basal transcription factors to initiate transcription [1, 4, 35-  
114 38]. The TAF1 and TAF2 subunits of TFIID subunits were previously implicated in  
115 binding the downstream core promoter region [39]. Remarkably, the downstream  
116 region of the super core promoter (SCP), a synthetic promoter that includes the  
117 TATA box, Inr, MTE and DPE [14], exhibits a robust transcriptional output in multiple  
118 human cell lines [14, 40], as compared to other commercially-available potent  
119 promoters. Mutating any of these 4 elements significantly reduces TFIID binding and  
120 the transcriptional output of the SCP [14, 41]. This observation strongly suggests that  
121 the transcription machinery in human cells recognizes downstream positions  
122 conforming to the *Drosophila*-defined DPE and MTE motif sequences. Moreover,  
123 based on recent cryo-electron microscopy (cryo-EM), it was suggested that the SCP

124 is bound by the TAF1, TAF2 and TAF7 subunits of human TFIID [42]. These findings  
125 imply that distinct human core promoters are recognized by the transcription  
126 machinery in human cells via specific nucleotides in the downstream core promoter  
127 region.

128 To identify preferred downstream positions in focused human core promoters, we  
129 designed a motif discovery strategy, using probabilistic partitioning algorithms, based  
130 on Expectation-Maximization model optimization.

131 This algorithm was applied to human and *Drosophila* core promoter regions  
132 comprising the base pairs from -10 to +40 relative to the TSS. Interestingly, we  
133 identified downstream overrepresented positions that resemble the *Drosophila* DPE  
134 motif. Available chromatin accessibility (ATAC-seq) footprints reveal that *Drosophila*  
135 and human Inr+DPE promoter classes resemble each other, especially in the  
136 proximal downstream region. Clustering analysis of the identified sequence motifs in  
137 ten species using a neighbor-joining algorithm indicated that canonical Inr+DPE -  
138 containing promoters could be common to metazoan species. Using dual-luciferase  
139 reporter assays we demonstrate the contribution of the identified downstream  
140 positions to the function of several human promoters. Furthermore, we show that the  
141 spacing between the preferred downstream positions and the Inr motif is important  
142 for human core promoter activity, as demonstrated for *Drosophila* promoters. Taken  
143 together, our motif discovery strategy identified novel functional downstream  
144 positions in human core promoters, supporting the existence of DPE-like motifs in  
145 the downstream region of human promoters that may serve as recognition sites for  
146 human TFIID.

147

148

## 149 **Results**

### 150 **Evidence for preferred downstream positions that resemble the DPE, in human** 151 **promoters**

152 The DPE motif is readily identified in *Drosophila* [16, 19, 20, 22, 23, 25, 26, 28, 30-  
153 32], and there is unquestionable evidence that *Drosophila* DPE motifs are  
154 recognized by the human transcription machinery *in vitro* and in multiple human cell  
155 lines [14, 20, 33, 34, 41]. Nevertheless, attempts to computationally identify a  
156 corresponding sequence motif in human promoters have been controversial [3].  
157 Applying the basic probabilistic partitioning algorithm illustrated in Fig 1A, we can  
158 easily identify a DPE motif in *Drosophila* promoters (Fig 2). Partitioning *Drosophila*  
159 promoters into three subclasses, we obtained one class containing both a canonical  
160 Inr and DPE motif (Class 1), a second one containing only an Inr motif (Class 2), and  
161 a third one containing a weak non-canonical Inr motif featuring G and A at about  
162 equal frequency at the TSS, which is preferentially flanked by T's on both sides  
163 (Class 3). Applying the same algorithm to human promoters, the results were  
164 somewhat different from the results of the run on *Drosophila* promoters: we identified  
165 a class containing a strong canonical Inr motif (Class 1) and another one containing  
166 a surprisingly similar weak non-canonical Inr motif (Class 2). A third identified class  
167 had almost no conserved base positions, except a weak preference for a purine at  
168 the TSS (Class 3).

169

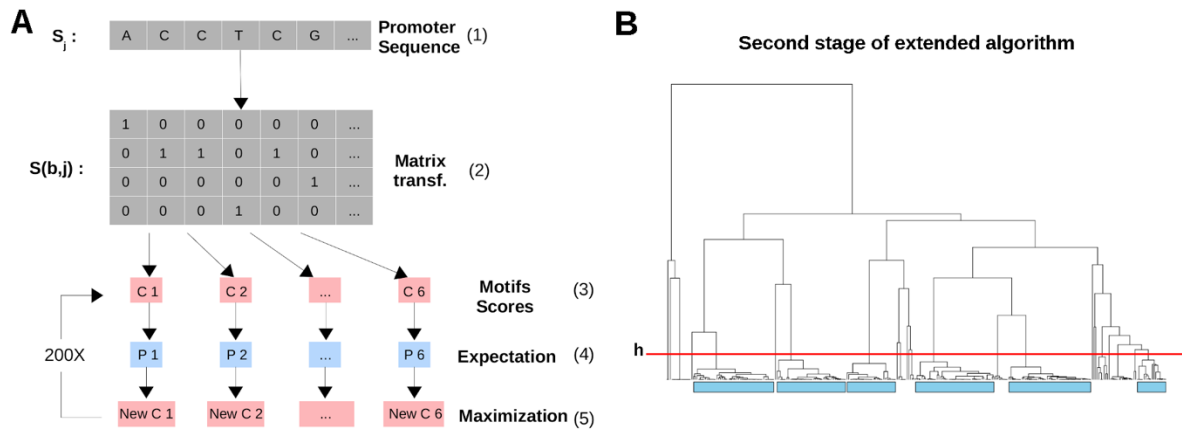

170

171 **Fig 1. EM algorithms implemented in this study.** (A) Diagram of the simple probabilistic  
 172 partitioning basic algorithm. A promoter sequence  $S_i$  (1) is transformed into a binary matrix  
 173  $S(b,j)$  (2) following guidelines in [43] where each row represents one of the four bases  $b$  (A,  
 174 C, G and T). Each element of the matrix  $S(b,j)$  has a value of 1 if the corresponding base is  
 175 present at position  $j$  in the sequence. The matrix is then scored against  $K$  number of motifs  
 176 (in this example  $K=6$ , C1 to C6) (3) to generate a probability score for each motif (P1 to P6)  
 177 (4). In the first cycle, the motifs are generated using a random seeding strategy where the  
 178 sequence probabilities follow a beta distribution. Next, each motif consensus is updated  
 179 using the promoter sequences in conjunction with their probabilities (New C1 to New C6) (5).  
 180 This cycle is repeated a number of times (in this example 200 times) to obtain the final  
 181 motifs. (B) Probabilistic partitioning extended algorithm. All steps in A are repeated a number  
 182 of times (in this example 50 times) to generate 300 motifs. These are then clustered  
 183 hierarchically. The resulting tree is cut at a specific height ( $h$ , here at distance equal to 0.5)  
 184 and the  $K$  nodes comprising the largest amount of motifs (identified by cyan rectangles)  
 185 are retained and averaged to generate the final motifs.  
 186

187 It is important to remember in this context that at least three human promoters,  
 188 namely IRF1, CALM2 and TAF7 (TAFII55), were experimentally shown to have  
 189 functional DPE motifs [20, 33, 34]. In line with this, human class 1 promoters seemed  
 190 to contain a very weak preference for nucleotides in positions +28, +29, which  
 191 prompted us to develop a more refined algorithm. One potential limitation of the  
 192 basic probabilistic partitioning algorithm is that it appears to have a tendency to split  
 193 the input sequences into classes of similar sizes, as can be inferred from the  
 194 frequencies presented in Fig 2. If we hypothesize that the DPE motif occurs only in a  
 195 very small subclass of human promoters, the corresponding sequence motif may  
 196 simply be hidden in one or several of the abundant subclasses shown in Fig 2. To



197 test this hypothesis, we modified the basic algorithm to favor the discovery of low  
 198 frequency classes with highly skewed base composition (Fig 1B, Methods section).

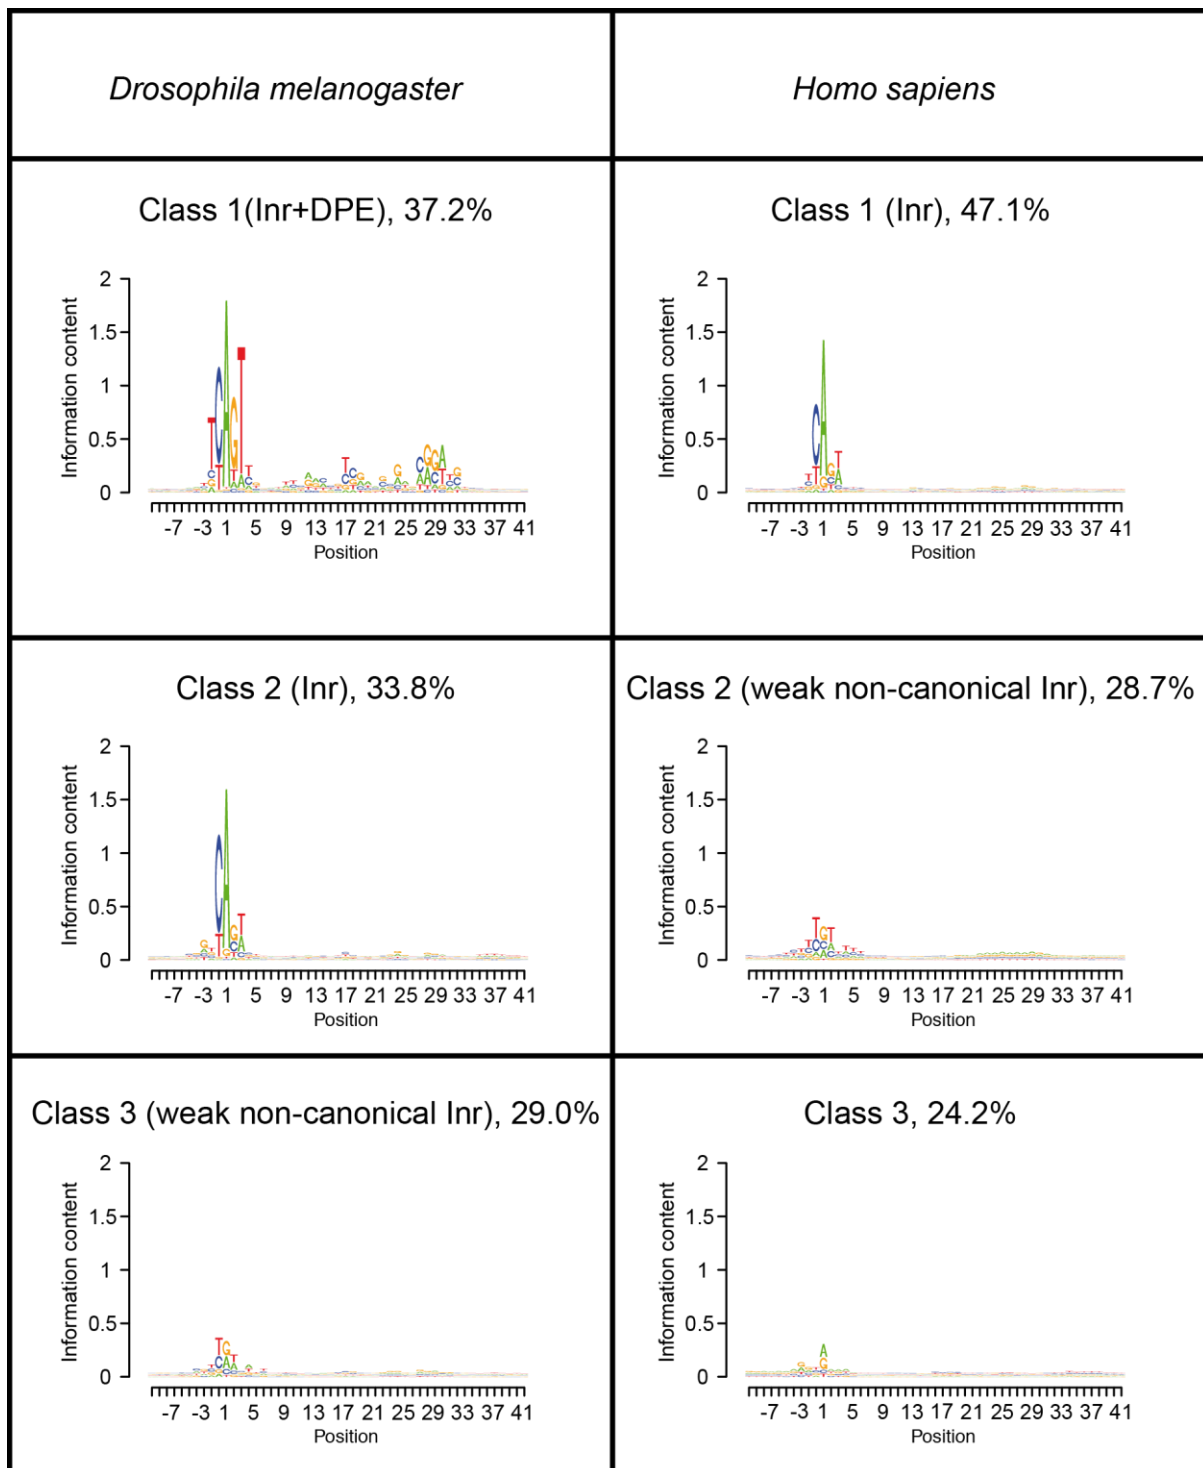

199

200 **Fig 2. Partitioning of promoter sequences using the basic probabilistic partitioning**  
 201 **EM algorithm.** Three major classes with distinct core promoter compositions were identified  
 202 within *Drosophila melanogaster* and human promoters. For each class, its frequency among  
 203 the examined promoters is indicated.

204

205 Applying the new algorithm to human promoter sequences, a stable partitioning was  
206 achieved with 6 classes (Fig 3). The vast majority of promoters (87.9%) fall into a  
207 major class showing a very weak initiator motif, essentially consisting of a purine at  
208 the TSS preceded by a pyrimidine, previously termed a YR<sub>+1</sub> initiator [3, 7, 44]. This  
209 class is reminiscent of class 1 obtained with the basic partitioning algorithm. The  
210 second most frequent class (4.4%) contains another known element, the TCT motif  
211 [45], which is found in promoters of ribosomal protein genes and other genes related  
212 to translation. The third most frequent class (3.0%) very much resembles the  
213 Inr+DPE class found in *Drosophila*. In particular, positions 28-32 relative to the A<sub>+1</sub> of  
214 the Inr, show almost identical base preferences between the two species. The  
215 remaining three classes show the same trinucleotide-repeat pattern (GCN)<sub>n</sub> in three  
216 different frames relative to an initiator motif consisting mostly of a purine at the TSS  
217 preceded by a pyrimidine. To our knowledge, this is a new pattern of unknown  
218 function.  
219

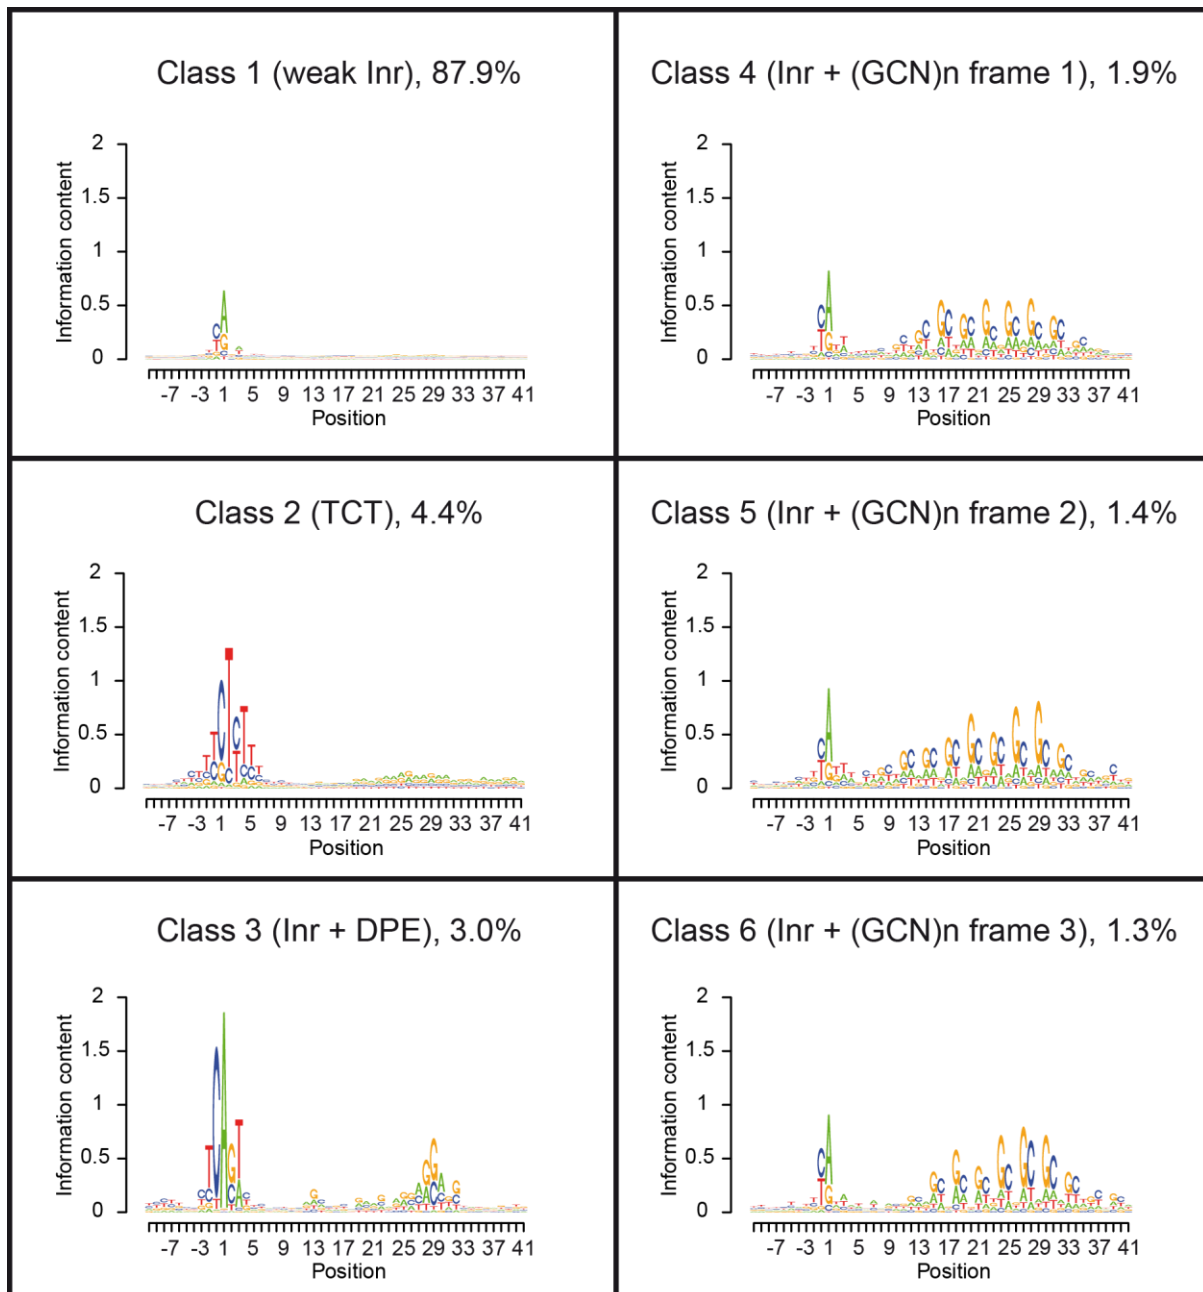

220

221 **Fig 3. Partitioning of human promoter sequences using the newly developed extended**  
222 **EM algorithm.** Six most frequent classes were identified within human promoters. The third  
223 most frequent class, which very much resembles the Inr+DPE class found in *Drosophila*,  
224 accounts for 3% of human core promoters. For each class, its frequency among the  
225 examined promoters is indicated.

226

227

228

229

230

231 In order to identify low frequency classes, which could have been missed with the  
232 basic algorithm, the new algorithm was also applied to *Drosophila* promoters  
233 partitioning them into 6 classes (S1 Fig). Based on its abundance and motif pattern,  
234 we speculate that the majority class (88.9%) obtained by this run is a mixture of all  
235 three classes obtained with the basic algorithm (Fig 2). Class 4 (2.5%) shows an  
236 extended Inr motif, GGTCACACT, but little base conservation in the downstream  
237 region. The other four classes are variants of the Inr+DPE class. In contrast to our  
238 expectations, no TCT and no trinucleotide repeat-containing classes were  
239 discovered. In summary, with regards to rare promoter classes, six-fold partitioning  
240 of human and *Drosophila* promoters highlights differences rather than commonalities  
241 between the two species.

242

243 To assess the robustness of the newly identified promoter classes, we  
244 performed bootstrapping. The complete promoter set was randomly resampled 10  
245 times using the "sampling with replacement" method. The resampled promoter sets  
246 were then analyzed with the extended partitioning algorithm. To minimize the risk  
247 that a class is missed by chance, we retained the 10 rather than 6 most frequently  
248 found classes from each bootstrapping round. To quantify reproducibility, we  
249 recorded for each class in Fig 3 the Pearson correlation coefficient with the most  
250 similar subclass from each round (S2 Fig). The results are highly reassuring. Five of  
251 the six newly identified promoter classes (including Inr+DPE) are reproduced by all  
252 resampled data sets with a high correlation coefficient ( $r > 0.8$ ). For class 6 (a GCN-  
253 repeat class), one (out of 10) of the bootstrapping rounds demonstrated low  
254 correlation with the newly identified class ( $r = 0.26$ ).

255

256 **The new computationally identified human Inr+DPE class closely resembles its**  
257 ***Drosophila* counterpart in terms of its DNA accessibility**

258 The questions whether a *Drosophila*-like DPE element exists in human (or in any  
259 other species) could also be debated from a biochemical perspective. In this case,  
260 one would have to show that the human DPE discovered computationally in this  
261 study undergoes similar protein-DNA interactions as its well-characterized  
262 *Drosophila* counterpart. One way to approach this question is by looking at  
263 chromatin accessibility footprints. ATAC-seq assays provide detailed information  
264 about protein-DNA contacts at single base resolution. Even though it does not reveal  
265 the identity of the interacting proteins, it has an advantage over ChIP-seq that it can  
266 distinguish between direct and indirect binding mechanisms. This is important in this  
267 study's context, because the proposed interaction partners of the human  
268 downstream promoter elements are part of a larger complex, TFIID, which could be  
269 recruited to a core promoter via other sequence elements, e.g. a TATA-box.

270 We evaluated ATAC-seq footprints for the most frequent promoter classes identified  
271 in *Drosophila* and human with regard to their capacity to discriminate between the  
272 computationally derived promoter classes (Fig 4). Notably, compared to the other  
273 classes, the DPE-containing classes are highly structured in the +10 to +35  
274 downstream regions. This suggests tight contacts with a specific protein surface,  
275 which do not occur in promoters lacking a DPE. Unsurprisingly, the ATAC-seq  
276 footprint of the human TCT class looks different from all other classes, especially at  
277 positions very close to the TSS.

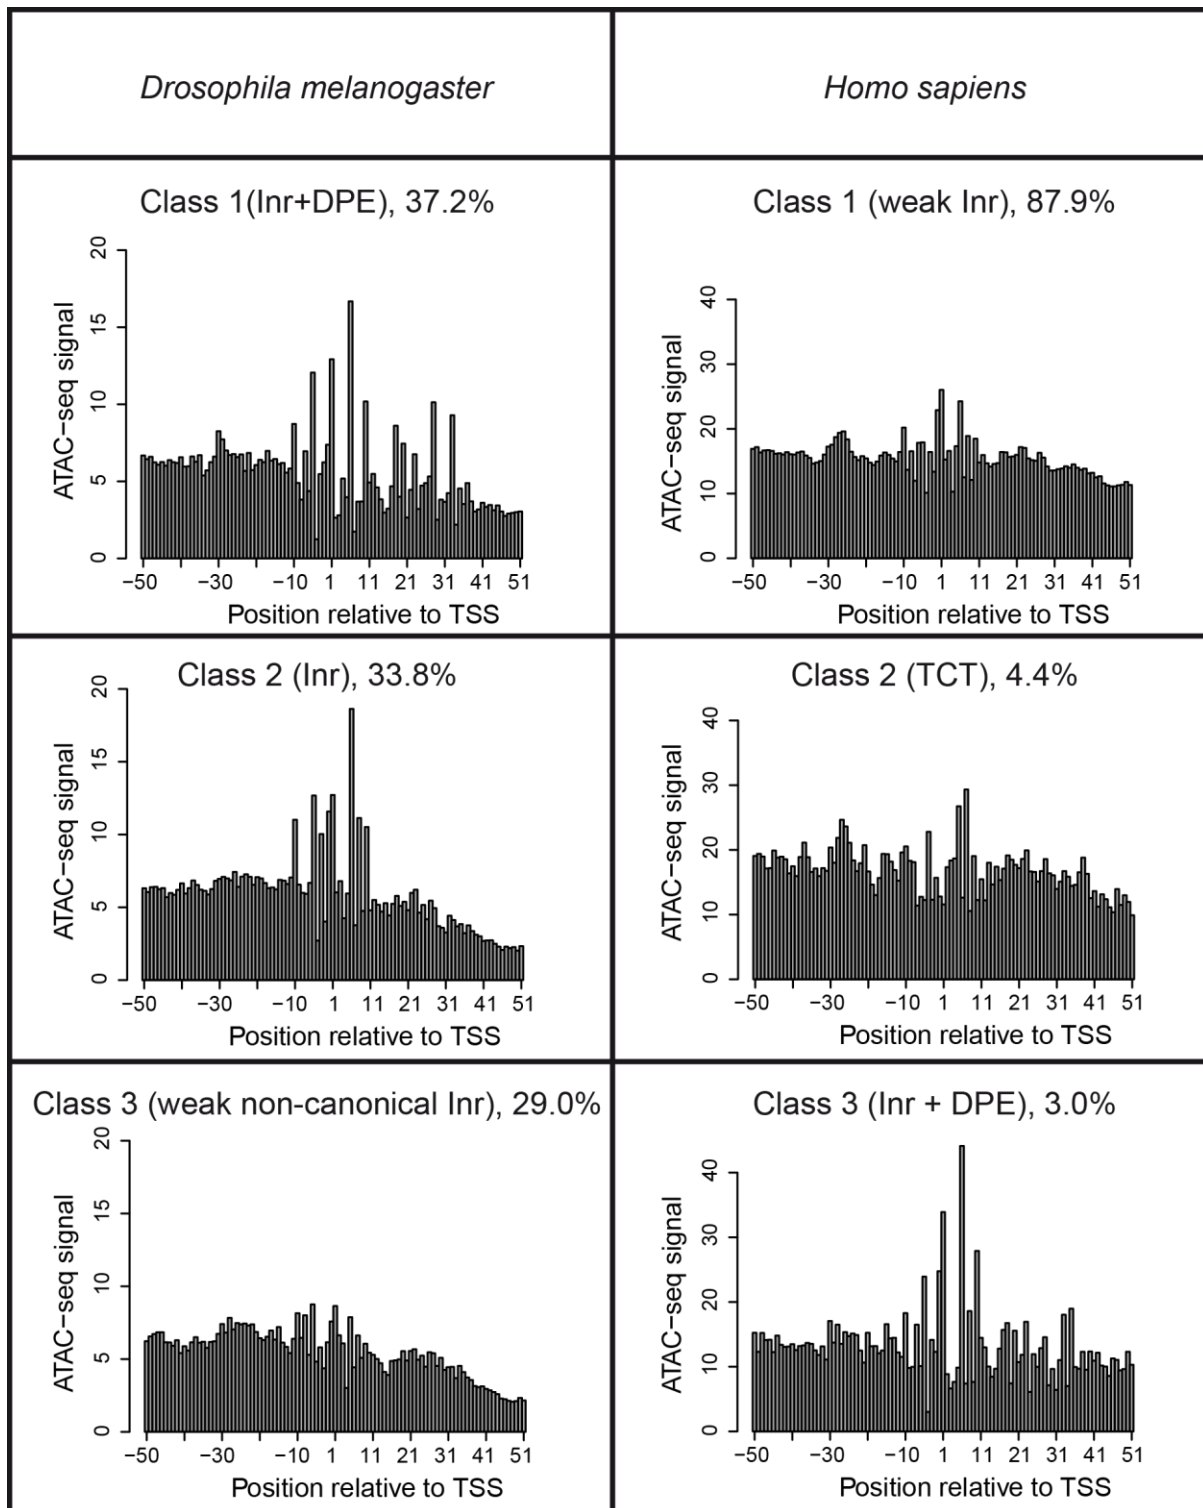

278

279 **Fig 4. ATAC-seq footprints of different promoter classes.** Single-base resolution ATAC-  
280 seq footprints are shown for the six most frequent promoter classes presented in Figs 2 and  
281 3. The ATAC-seq signal displayed on the vertical axis is expressed as fold enrichment over  
282 genome-wide background. These numbers tend to be high because promoters are among  
283 the most accessible regions of the genome.

284

285

286 The ATAC-seq footprints of the Inr+DPE promoter classes from the two species are  
287 not only highly structured but also similar to each other, in particular in the proximal  
288 downstream region (see detailed views in Fig 5A and 5B). In both species, local  
289 maxima appear at positions 1, 6, 10, 18, 20, 23, 28 and 33, while local minima  
290 appear at positions 7, 19, 21, 24, 29 and 34. Furthermore, a U-shaped valley is seen  
291 between positions 12 and 17.

292 To support these intuition-guided assessments in a more objective manner, we  
293 computed correlation coefficients of ATAC-seq footprints for all positions in the  
294 proximal downstream promoter regions for all pairs combinations of promoter  
295 classes (Fig 5C). Indeed, the two Inr+DPE classes show the highest correlation  
296 ( $r=0.89$ ). Classes with a canonical or recognizable Inr (dm6\_c1, dm6\_c2, hg19\_c1,  
297 hg19\_c3) also show positive correlations among themselves, whereas the human  
298 TCT class (hg19\_c2) negatively correlates with all but one class. In summary, our  
299 results confirm that the newly discovered human Inr+DPE class, identified by  
300 computational sequence analysis in a completely experiment-blind manner, closely  
301 resembles its *Drosophila* counterpart in terms of direct protein-DNA contacts.

302

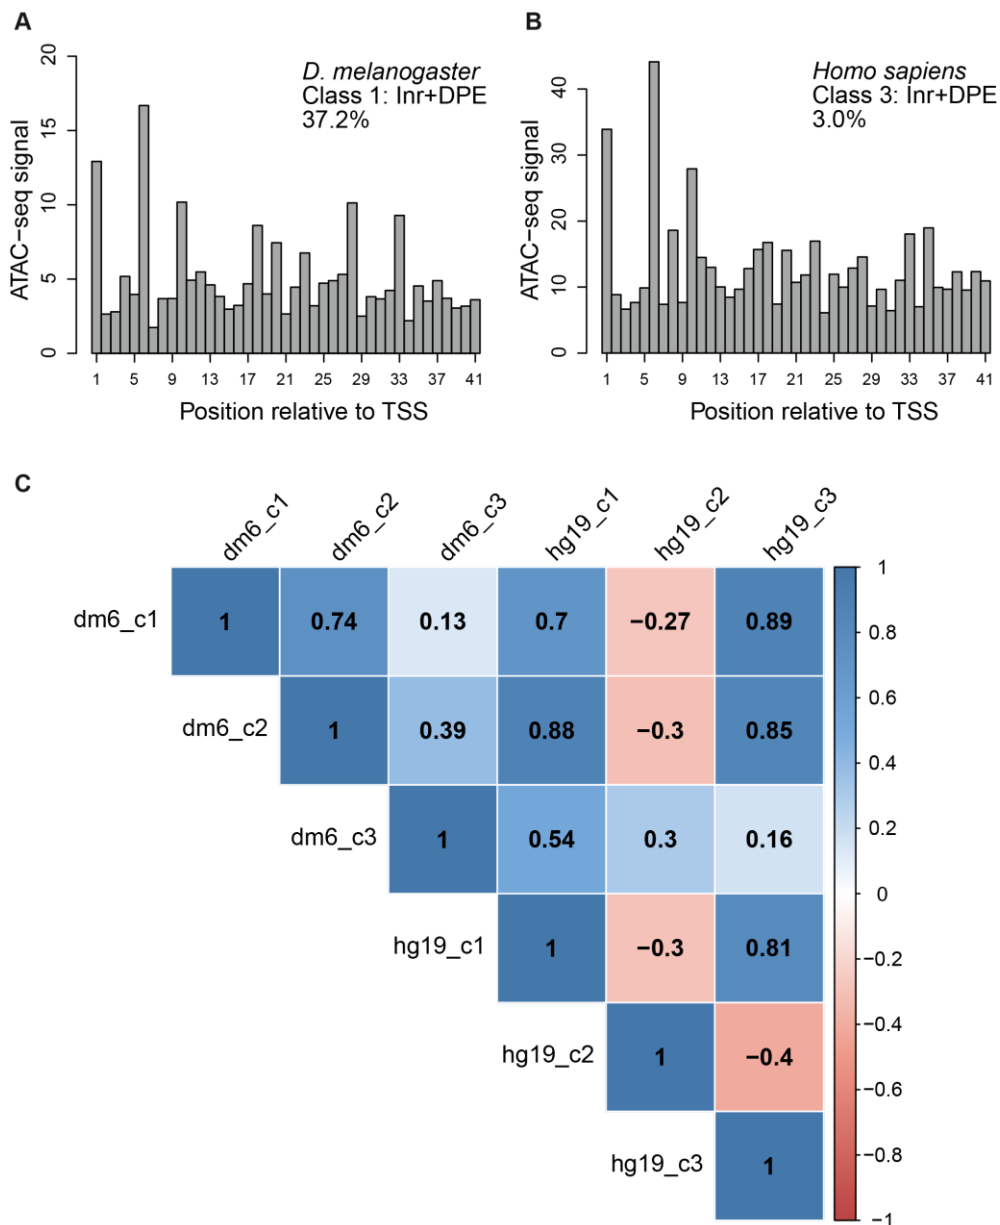

303

304

305 **Fig 5. Comparisons of single-base resolution footprints for proximal promoter**  
 306 **downstream regions of *Drosophila* and human promoter classes.** Single-base  
 307 resolution footprints for proximal promoter downstream regions of *Drosophila* (A) and  
 308 human (B) Inr+DPE promoter classes. (C) Correlation similarity matrix of promoter  
 309 class-specific ATAC-seq footprints. Shown are Pearson correlation coefficients  
 310 computed from the ATAC-seq footprints for promoter regions +1 to +41.

311

312

### 313 DPE-like motifs in other species

314 The finding that the Inr+DPE element was present in human promoters, opened the

315 intriguing hypothesis that it could be more widespread and might occur in other



316 species, perhaps even beyond the metazoan kingdom. To this end, we applied the  
317 EM partitioning algorithm with K=6 to promoters from eight additional species,  
318 including plants (*A. thaliana* and *Z. mays*) and fungi (*S. cerevisiae* and *S. pombe*).  
319 To visualize the relationship between all promoter classes obtained in this way  
320 (including those from human and *Drosophila*), we clustered the corresponding  
321 sequence motifs using neighbor-joining. The resulting tree (Fig 6) was composed of  
322 three distinct domains: two clades (colored blue and red) and a middle ground  
323 (green) comprising multiple branches originating from nodes close to the tree center.  
324 To relate these domains to the motifs shown in Figs 2 and 3, we included consensus  
325 logos for each domain, which were obtained by averaging over the base probabilities  
326 of all motifs from each domain. Clearly, the sequence logo of the red sub-tree  
327 resembles the *Drosophila* Inr+DPE promoter class shown in Fig 2. The green and  
328 blue domains corresponded to CA and TG variants of the basic YR initiator motif,  
329 respectively. We noted that *D. melanogaster* Inr+DPE motifs ((Dm).m1, m3, m4, m5,  
330 m6) have close neighbors from all metazoan species (*H. sapiens* (Hs).m3; *M.*  
331 *musculus* (Mm).m2; *D. rerio* (Dr).m2, m3, m5, and m6; *A. mellifera* (Am).m2, m3,  
332 m4, m5 and m6; *C. elegans* (Ce).m4 and m6), while none of them are from species  
333 outside the metazoan kingdom, like plant and yeast. Taken together, the  
334 aforementioned observations strongly suggest that canonical Inr+DPE promoters  
335 could in fact be common to all metazoan species, and absent outside the metazoan  
336 kingdom.

337

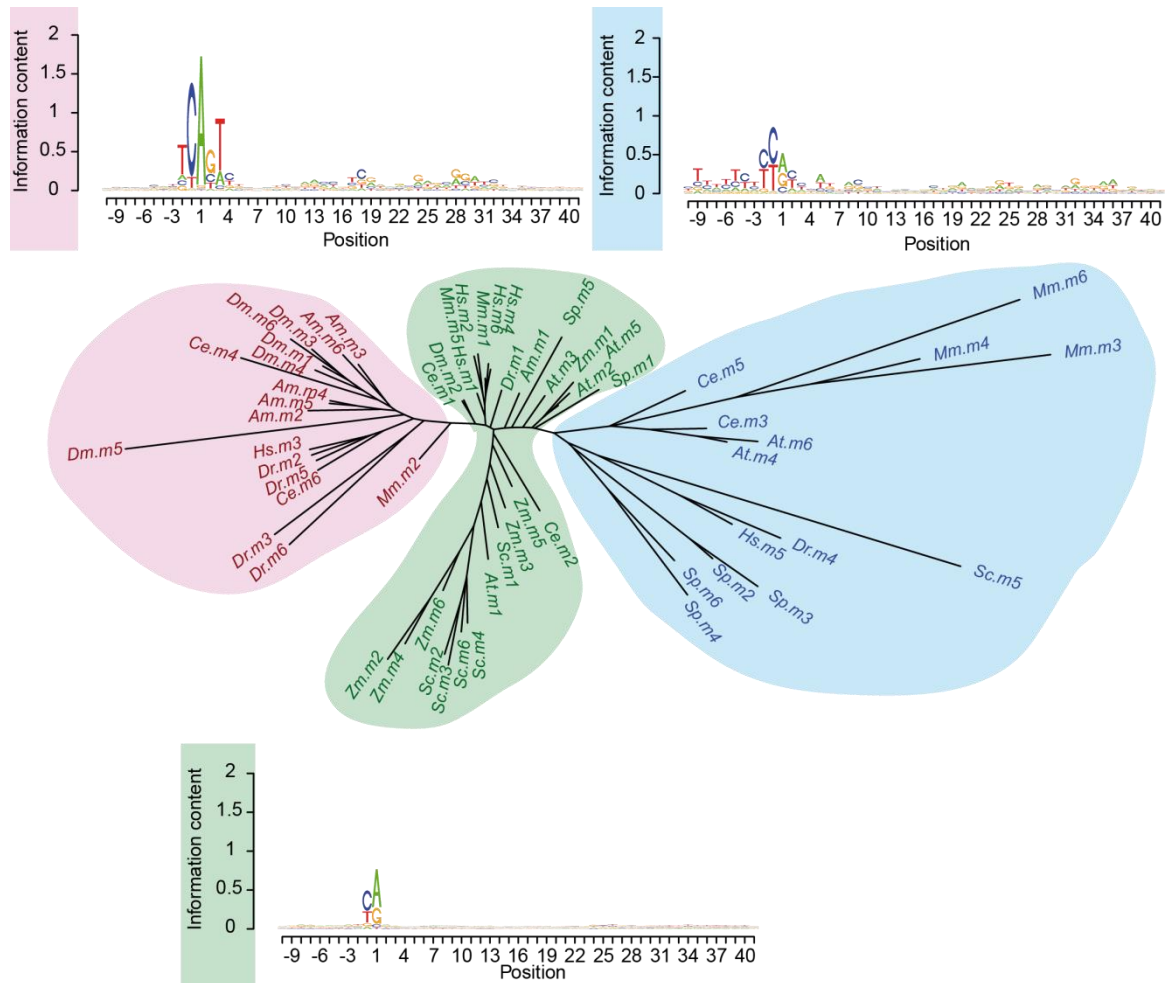

338  
339

340 **Fig 6. Neighbor joining tree of motifs found in the promoter region of 10**  
 341 **species.** Global NJ tree obtained by clustering 6 motifs (identified using the  
 342 presented EM algorithm, see Method for detail) in 10 species (*H. sapiens*; *M.*  
 343 *musculus*; *D. rerio*; *C. elegans*; *D. melanogaster*; *A. mellifera*; *A. thaliana*; *Z. mays*;  
 344 *S. cerevisie*; *S. pombe*). The tree is composed of two main clades (highlighted in red  
 345 and blue) and a middle ground (green) containing several small branches originating  
 346 from nodes close to the center. The consensus sequence of each clade is plotted  
 347 alongside it. The Inr+DPE cluster (red) does not contain plants nor fungi motifs,  
 348 highlighting the idea that the Inr+DPE element is present only in metazoa. The green  
 349 and blue branches are variations of the basic YR motif.  
 350

### 351 The identified downstream positions are functional in HEK293 cells

352 In order to experimentally test whether the identified downstream positions are  
 353 indeed functional, we analyzed a list of 20 potentially functional human core  
 354 promoters. To narrow down the selection to several promoters, we applied the  
 355 EleMeNT algorithm [46] to detect possible initiator and DPE motif, based on PWM's

356 constructed using experimental work in *Drosophila* [46]. We also verified that the  
357 promoters lack a TATA-box upstream of the examined region, and ensured that the  
358 initiation type is sharp (S3 Fig). Finally, two candidate core promoters were chosen  
359 for experimental analysis, namely LRCH4 (Leucine Rich Repeats And Calponin  
360 Homology Domain Containing 4) and ANP32E (Acidic Nuclear Phosphoprotein 32  
361 Family Member E).

362 Notably, the prominent positions in the newly identified human downstream motif  
363 (Fig 3, class 3) are G nucleotides at positions +28 and +29 (relative to the A<sub>+1</sub>  
364 position of the relevant initiator motif). Moreover, a sequence bias at +24(G) (relative  
365 to the A<sub>+1</sub> of the Inr) was previously observed and experimentally shown to  
366 contribute to the function of *Drosophila* DPE-containing promoters [28]. Thus, we  
367 focused on 3 preferred downstream positions (+24, +28 and +29 relative to the A<sub>+1</sub>  
368 position of the relevant initiator motif), mutating each of them from G to T nucleotide  
369 (mPDP version; exact sequences provided in Table 1). These substitutions were  
370 based on prior knowledge regarding functional downstream positions in *Drosophila*  
371 *melanogaster* promoters [23, 46].

372  
373  
374  
375

376  
377  
378

**Table 1. Sequences used for testing activity of identified downstream positions.**

| Name   | Cloned promoter sequence                                                                               | DPE score (ElementNT) | Class 3 score (EM) |
|--------|--------------------------------------------------------------------------------------------------------|-----------------------|--------------------|
| LRCH4  | cgg <b>tccc</b> <i>gtcagtcag</i> gcagcgc<br>ggagccgc <b>g</b> g <b>G</b> agc <b>GG</b> atggc<br>ggcggc | 0.2494                | 11.24              |
| ANP32E | atggaggctcagtcctctgagca<br>gccattgaagg <b>G</b> gaa <b>GG</b> aactg<br>cgggtg                          | 0.0278                | 13.58              |
| CKS2   | tgcggtcg <b>ttagt</b> ctccggcga<br>gttggtgcctg <b>G</b> gct <b>GG</b> acgtg<br>gttttgt                 | 0.8182                | 7.22               |
| CELF1  | gggggtg <b>ttctg</b> ctctggcggca<br>gcggcagcggc <b>G</b> gcg <b>GG</b> acgcg<br>gaggctc                | 0.2425                | -0.20              |
| CTSA   | catgacttccag <b>tcccc</b> ggggcg<br>cctcctggaga <b>G</b> caa <b>GG</b> acgcg<br>ggggagc                | 0.2425                | 8.27               |

379 Mutated positions are marked in bold and UPPERCASE (G>T substitutions). Initiator  
380 and DPE elements, as detected by the ElementNT algorithm, are italicized or  
381 underlined, respectively.  
382

383 We have generated both WT and mPDP constructs (Table 1), and tested them using  
384 dual-luciferase assays in HEK293 cells (Fig 7A). Strikingly, the substitution of the 3  
385 positions was sufficient to reduce LRCH4 and ANP32E reporter levels to either 0.6  
386 or 0.75-fold relative to the WT promoter, respectively.

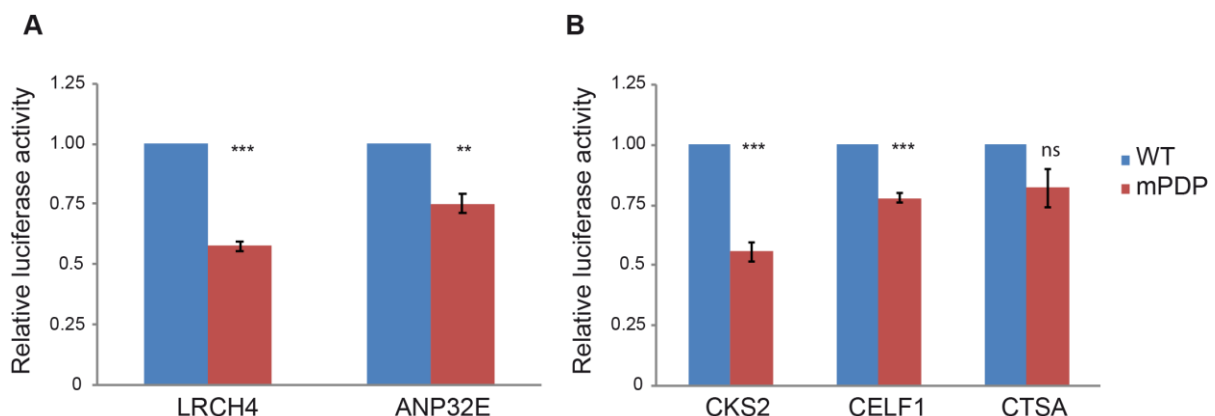

387

388 **Fig 7. The preferred downstream core promoter positions (PDP) are functional**  
389 **in HEK293 cells.** Results indicate the fold change in the WT versus mPDP version  
390 of the relevant promoter, tested by dual-luciferase assays in HEK293 cells. Each  
391 experiment was performed in triplicates, results represent 4-6 independent  
392 experiments  $\pm$ SEM. \*\*\*p<0.001, \*\*p<0.01, ns- not significant, calculated using

393 Student's t-test. Two candidate genes, LRCH4 and ANP32E (A), were first chosen  
394 based on their core promoter composition and conservation, as discussed in the  
395 Results section. (B) As the reduction in the LRCH4 reporter activity was more  
396 pronounced than that of the ANP32E gene, the characteristics of LRCH4 promoter  
397 were used as a reference (see Results section for the exact criteria), and the  
398 promoters of CKS2, CELF1 and CTSA were chosen for experimental examination.  
399

400 We next sought to examine additional candidates, to gain a better understanding  
401 of the preferred downstream positions. Since the reduction in the LRCH4 reporter  
402 activity was more pronounced than that of the ANP32E gene (p-value 0.016) (as  
403 may have been expected based on the ElemeNT score, Table 1), we used the  
404 characteristics of LRCH4 as a reference. To this end, we started from a broader list  
405 of potentially-functional promoters. The resulting list was analyzed using ElemeNT,  
406 with the DPE score required to be >0.2 and accompanied by a Bridge element,  
407 similarly to LRCH4. The absence of a TATA-box was verified as well. As we  
408 analyzed minimal promoters (-10 to +40) (*i.e.*, resulting in relatively low expression),  
409 and the expression of the LRCH4 gene in HEK293 cells is 61 (based on CAGE data  
410 generated by FANTOM5 consortium), an expression cutoff of >61 was applied as a  
411 criterion to select candidate promoters that would likely be expressed in our  
412 experimental system. Moreover, transcription initiation pattern (sharp or broad) was  
413 manually determined using the EPDnew website for each examined gene, based on  
414 the distribution of CAGE tags around the reported transcription start site.

415 Using the above guidelines, we chose 3 additional unrelated promoters to be  
416 tested, namely, CKS2 (CDC28 Protein Kinase Regulatory Subunit 2), CELF1  
417 (CUGBP Elav-Like Family Member 1) and CTSA (Cathepsin A). Using dual-  
418 luciferase reporter assays in HEK293 cells, we discovered that CKS2 and CELF1  
419 reporter activities were reduced to either 0.6 or 0.8-fold relative to the WT promoter,  
420 respectively (Fig 7B). However, the luciferase reported activity of the mPDP version

421 of CTSA was not significantly lower than the WT version. Notably, this may result  
422 from the transcription initiation pattern of CTSA, which was slightly less focused than  
423 LRCH4, ANP32E, CKS2 and CELF1 (S3 Fig). Taken together, using the described  
424 EM algorithm and reporter assays in HEK293 cells, we identified a preference for  
425 conserved downstream positions within natural human core promoters with sharp  
426 transcription initiation patterns, and demonstrated that they are functional.

427 **The identified downstream positions are strictly dependent on the spacing**  
428 **from the Inr**

429 In order to test whether the identified downstream positions are canonical core  
430 promoter elements that, similarly to the *Drosophila* DPE, are strictly dependent on  
431 the spacing from the Inr, we generated multiple mutants of the of LRCH4 and CKS2  
432 promoters, in which two nucleotides were either deleted or added (m2 or p2,  
433 respectively) in positions 10 or 18 relative to the A<sub>+1</sub> position of the TSSs. Using  
434 dual-luciferase reporter assays in HEK293 cells, we detected significantly reduced  
435 activities of LRCH4 promoters in which 2 nucleotides were either deleted or added at  
436 positions 10 or 18 (Fig 8). Although deletion of 2 nucleotides in position 10 of the  
437 CKS2 promoter did not result in reduced activity, significantly reduced activities were  
438 detected in CKS2 promoters in which 2 nucleotides were either deleted or added at  
439 position 18, and when 2 nucleotides were added in position 10. By and large, the  
440 effects of these addition/deletion mutations argue in favor of a spacing dependency  
441 of the newly discovered PDP on the Inr, and against the possibility that these PDP  
442 merely serve as a binding site for a sequence-specific transcription factor that is not  
443 typically associated with core promoters.

444 We also examined whether two consecutive G nucleotides outside the PDP could  
445 result in reduced activities, similar to the observed mPDP activities. To this end, we  
446 mutated 2 consecutive G nucleotides to T nucleotides (mGG) in the vicinity of the  
447 PDP in the LRCH4 (at +35-36) and CKS2 (at +34-35) promoters. Interestingly, the  
448 mGG version of the LRCH4 promoter displayed reduced activity, whereas the mGG  
449 version of the CKS2 promoter did not display a similar reduction. Thus, the specific  
450 context of core promoter elements may have variable effects, as previously  
451 demonstrated (see [47], for example).

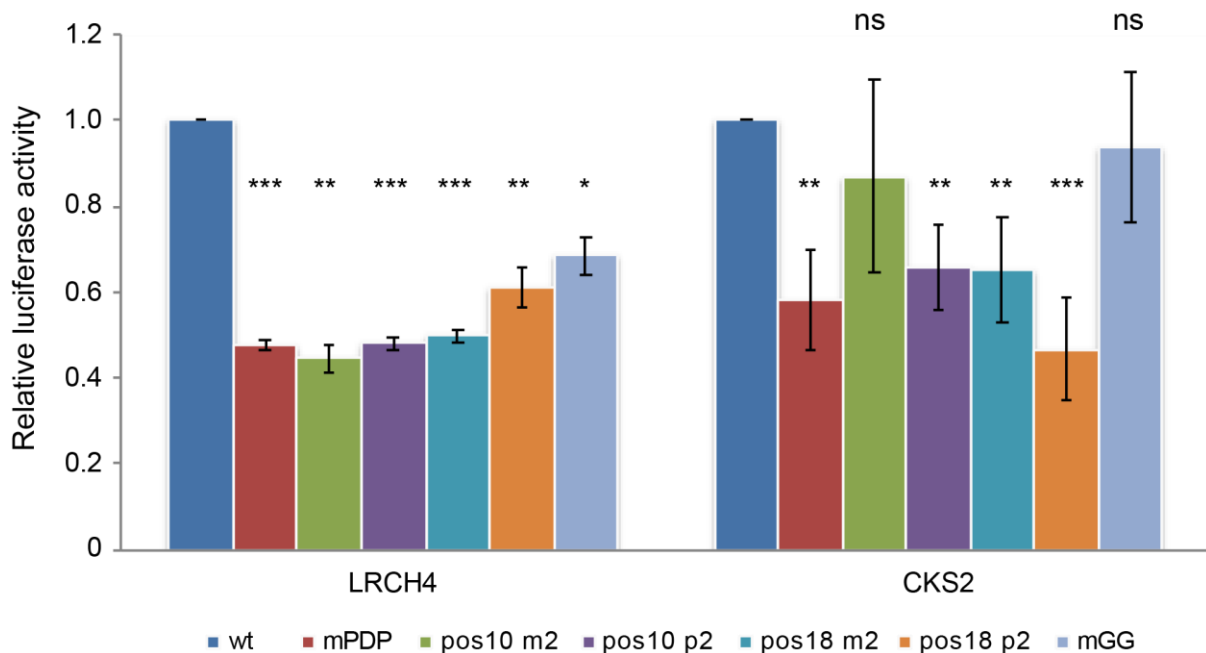

452

453 **Fig 8. The activities of the LRCH4 and CKS2 in HEK293 cells are dependent on**  
454 **the spacing between the Inr and the PDP.** Results indicate the fold change in the  
455 WT versus the mutant versions (mPDP, deletion or addition (m2 or p2, respectively)  
456 of 2 nucleotides in positions 10 or 18 relative to the A<sub>+1</sub> position of the TSSs, or  
457 mutation of 2 consecutive G nucleotides in the vicinity of the PDP to T) of the  
458 indicated promoters, tested by dual-luciferase assays in HEK293 cells. Each  
459 experiment was performed in triplicates, results represent 3-4 independent  
460 experiments ±SEM. \*\*\*p<0.001, \*\*p<0.01, ns- not significant, calculated using  
461 Student's t-test.

462

463

464

## 465 **Discussion**

466 The presence of downstream core promoter positions within human promoters that  
467 are transcriptionally important has been a matter of controversy in the literature.  
468 Although the DPE was originally reported as conserved from *Drosophila*  
469 *melanogaster* to humans [20], and additional studies identified functional  
470 downstream core promoter motifs in human promoters [33, 48], one publication  
471 suggests that the DPE motif is *Drosophila melanogaster*-specific [3], whereas  
472 another bioinformatics analysis indicated that ~25% of human promoters contain a  
473 sequence that matches the consensus of *Drosophila* DPE [49]. It should be noted,  
474 however, that the latter study did not account for the strict spacing dependency  
475 between the DPE and the Inr.  
476 Nonetheless, ample evidence exists showing that the downstream region is an  
477 important regulator of transcriptional output in humans. The super core promoter  
478 (SCP), containing the TATA-box, initiator, MTE and DPE core promoter motifs,  
479 exhibits a robust transcriptional output in human cells, as compared to other  
480 commercially-available potent promoters [14, 40]. Mutating any of these elements  
481 significantly reduced the transcriptional output of the promoter [14], suggesting that  
482 the transcription machinery in human cells recognizes the DPE. Moreover, human  
483 TFIID is associated with the downstream core promoter area of the SCP [41, 42, 50],  
484 and both TFIID subunits TAF1 [42, 50] and TAF2 [42, 50, 51] bind the downstream  
485 core promoter region.

486 The aim of our study was to search for a DPE-like core promoter motif in human  
487 promoters. In line with previous studies [3, 7, 44], our analysis showed that the  
488 majority of human promoters contain a YR<sub>+1</sub> initiator (Fig 3, class 1). Importantly,  
489 using the extended EM algorithm, we discovered a novel class of human promoters



490 containing an Inr and a downstream sequence motif that resembles the *Drosophila*  
491 DPE (Fig 3, class 3). Unlike *Drosophila* DPE-containing promoters that account for  
492 more than a third of promoters (Fig 2, class 1), human class 3 promoters account for  
493 3% and were not enriched for developmental processes or for biological regulation.

494 Interestingly, we did not identify an enrichment of human Inr and MTE (motif 10  
495 element)-containing promoters. The MTE motif was first inferred from computational  
496 analysis of *Drosophila* promoter sequences [30]. The motif was originally defined by  
497 an algorithm allowing for extensive distance variation relative to the TSS. Its  
498 functional significance was later demonstrated in both *Drosophila* and human gene  
499 expression systems, using promoters from both species [21]. In that study, the MTE  
500 is presented as a core promoter element with a consensus sequence  
501 CSARCSSAACGS that occurs between positions +18 to +29, overlapping with the  
502 DPE motif by two base pairs. Similar to the DPE motif, it was reported that the MTE  
503 function is strictly dependent upon a functional Inr, and is involved in interaction with  
504 TFIID [21, 22]. Furthermore, although it was defined as a distinct element, a synergy  
505 between the MTE and the DPE was demonstrated. The *Drosophila* class 1 sequence  
506 logo that was detected using our algorithm supports C at position +18, R at +22, and  
507 CGS at +27-29. We further note an additional conserved Y at position +17, just  
508 preceding the reported MTE region.

509 Further examination of the downstream region revealed additional TFIID-  
510 interacting subregions, comprised of +18-22 and +30-33, termed Bridge [22]. The  
511 Bridge element was demonstrated to support, but not fully-restore, DPE-dependent  
512 transcription [23]. It was recently proposed that the downstream core promoter  
513 region might be a single functional unit (resembling the “Ohler-defined DPE”, [30])  
514 [52]. We compared our sequence motifs for the *Drosophila* and human Inr+DPE

515 promoter classes to the "functional" MTE motifs of two *Drosophila* promoters (*Tollo*  
516 and CG10479) derived by single-base mutational analysis (Theisen et al. 2010). To  
517 make the motifs visually comparable, we converted mutational analysis data for each  
518 promoter into a corresponding sequence logo by dividing the relative transcriptional  
519 activities of each base at a given positions by the sum of the transcriptional activities  
520 at the same position. We further computed Pearson correlation coefficients for all  
521 logo pairs, in order to assess similarity in a more objective manner (Fig 9). By visual  
522 inspection we note a good agreement between the functional MTE motif of the  
523 CG10479 promoter and our computationally derived motif for the *Drosophila*  
524 Inr+DPE promoter class. This intuitive judgment is supported by a high Pearson  
525 correlation coefficient of 0.83. The functional MTE motif for *Tollo* shows more  
526 divergence with regard to both the CG10479 functional motif and the computationally  
527 derived Inr+DPE motif. Not surprisingly, both functional motifs show better  
528 correlation with the *Drosophila* than with the human Inr+DPE motif. We further note a  
529 high correlation coefficient of 0.74 for the two computationally derived motifs,  
530 suggesting that the two species share conserved sequence determinants not only  
531 within the canonical Inr and DPE motifs, but also in the region between them.

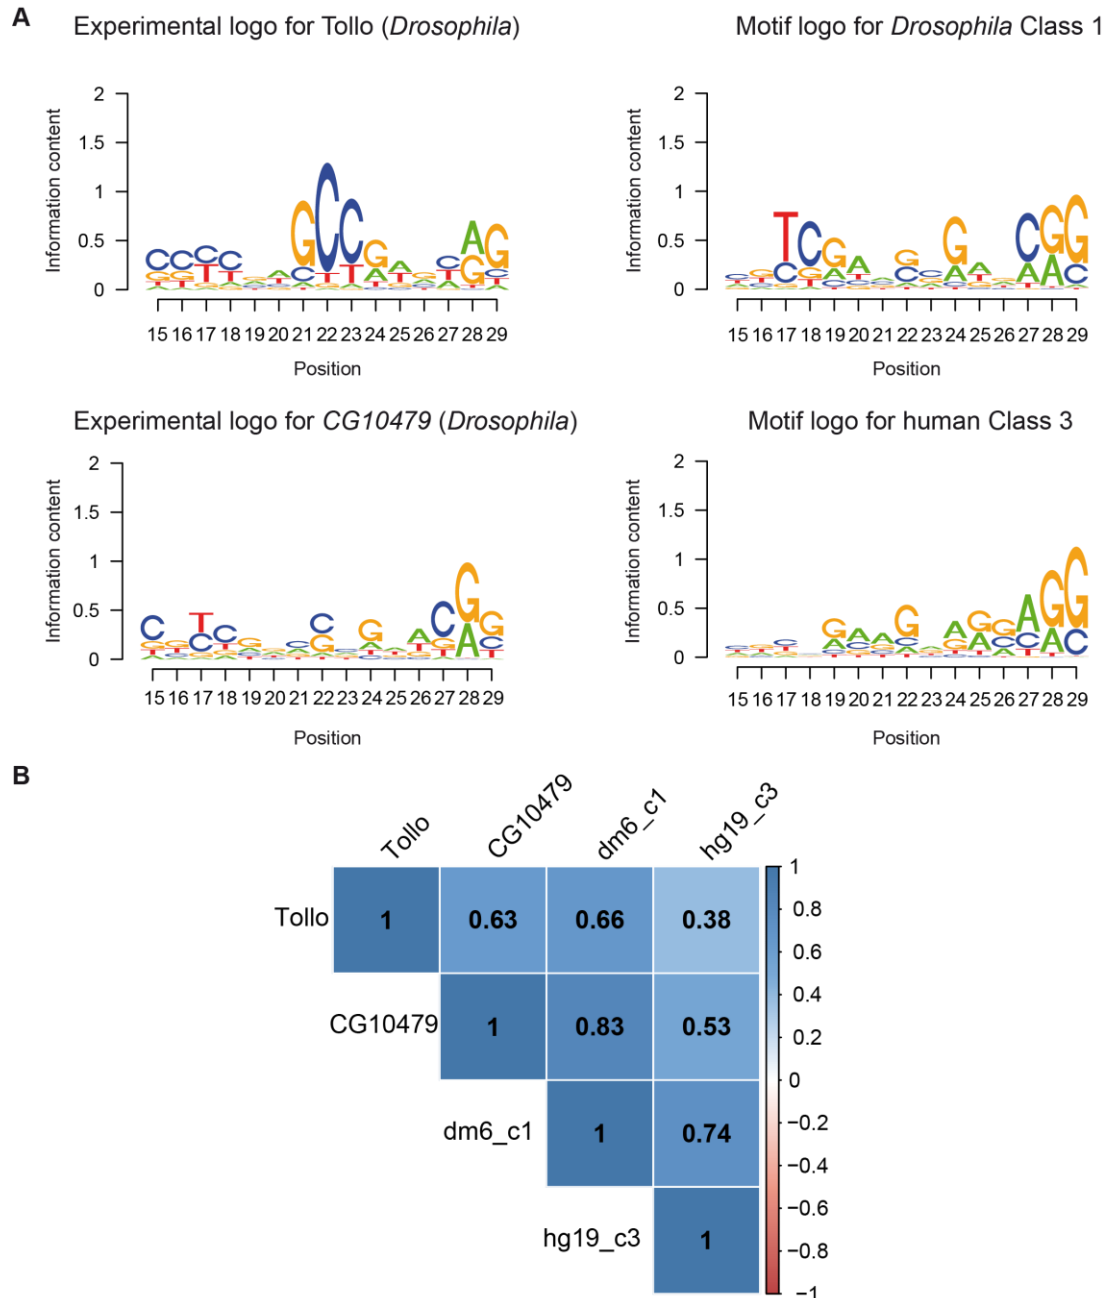

532

533 **Fig 9. Comparison of experimental logos with sequence motif logos.** (A)  
 534 Experimental logos are based on exhaustive single-base mutational analysis of the  
 535 +15 to +29 region of two *Drosophila* promoters [22]. Relative expression values were  
 536 rescaled such as to sum up to one at each position. The sequence motif logos were  
 537 extracted from to logos shown in Figs 2 and 3. All logos have been over-skewed  
 538 with an exponent of 2 to highlight differences between them. (B) Correlation plot showing  
 539 Pearson correlation coefficients computed from the base probabilities underlying the  
 540 logos. Note the high correlation of the *CG10479* experimental logo with the  
 541 *Drosophila* motif logo.

542

543

544

545 A critical reader could question our results by arguing that we modified our  
546 extended partitioning algorithm to obtain the desired result. A general problem with  
547 partitioning and other unsupervised machine learning approaches is that the result  
548 cannot be assessed in terms of accuracy. We thus can only argue that the  
549 classification we obtain with the extended partitioning algorithm is biologically  
550 plausible or meaningful. The nature of the other four simultaneously discovered low-  
551 frequency promoter classes gives us assurance in this respect. Class 2 perfectly  
552 matches a previously reported promoter class, characterized by the presence of a  
553 TCT motif and its association with genes involved in translation. The other three  
554 minority classes strikingly resemble each other in that they contain the same  
555 trinucleotide repeats in three different frames relative to the TSS. These highly  
556 unusual properties make it unlikely that these classes are collateral noise of an  
557 algorithm specifically designed and fine-tuned to discover another promoter class.

558 The weak TGT motifs observed with the basic algorithm (Fig 2, *Drosophila* class 3  
559 and human class 2), which are reminiscent of the previously described TGT motif  
560 [53], were not detected using the extended EM algorithm (Fig 3). Notably, weak  
561 motifs in general, may reflect the presence of additional or a mixture of sub-classes  
562 of promoters.

563 The newly discovered human promoter classes 4-6 are characterized by the same  
564 tri-nucleotide motifs (GCN)<sub>n</sub> in three different frames. The reason why these  
565 promoters were put into different classes is because we used an algorithm that does  
566 not allow for limited shifting of sequences relative to each other. Trinucleotide  
567 repeats in 5'UTRs are suggestive of a function in translation. Specifically, we  
568 conjecture that they may be part of regulatory upstream open reading frames (see

569 [54] for review). If true, we would expect that the repeats be preceded by in-frame  
570 ATG codons. To test this hypothesis, we tabulated the frequencies of ATG at  
571 proximal promoter downstream positions (S1 Table). Indeed, in each class, we  
572 observed a strong, 3bp periodic bias in the positional distribution of ATG codons,  
573 compatible with translation of the CGN repeats into poly-alanine. A regulatory  
574 function of these repeats involving translation thus seems plausible.

575       Importantly, we demonstrate the contribution of the 3 G nucleotides, located at  
576 positions +24, +28 and +29 relative to the A<sub>+1</sub> position, to the function of four natural  
577 human promoters. Using luciferase reporters driven by minimal promoter constructs  
578 (-10 to +40) in HEK293 cells, we demonstrated that changing G nucleotides at these  
579 positions to T significantly reduces the transcriptional output to 0.6-0.8 fold, as  
580 compared to the WT promoters. This is a substantial effect on enzymatic reporter  
581 activities, considering the fact that only 3 nucleotides in a non-Inr region of the  
582 minimal promoters were substituted. Remarkably, the reduced reporter activities of  
583 promoters in which the spacing between the Inr and the DPE was altered by addition  
584 or deletion of 2 nucleotides, largely suggest that, similarly to the *Drosophila* DPE, the  
585 newly discovered PDP depends on spacing from the Inr. It also disfavors the  
586 possibility that the PDP serves as a binding site for a sequence-specific transcription  
587 factor that is not normally associated with core promoters.

588       During the preparation of the manuscript, we became aware of a comprehensive  
589 work from the Kadonaga lab [55], which used machine learning to generate  
590 predictive models to analyze human Pol II core promoters and identified a  
591 downstream promoter region (DPR) spanning from +17 to +35, which contributes to  
592 the transcriptional output of a fraction of human promoters. Reassuringly, the  
593 positions identified in our study highly match specific positions within the DPR

594 identified by the Kadonaga lab, which supports the concept of a single functional  
595 downstream unit [30, 52]. Moreover, different approaches to identify the important  
596 downstream positions were taken; while we started from bioinformatics analysis and  
597 then tested naturally-occurring minimal promoters, the Kadonaga lab has first used  
598 massively parallel reporter assays (MPRA) of an extensive library composed of  
599 randomized version of the downstream region, using a specific promoter backbone.  
600 Moreover, the experiments were performed in two different cell lines, using different  
601 readout as the outcome, either the indirect luciferase reporter activity (this study) or  
602 the RNA output itself, using either RNAseq or primer extension analysis [55].  
603 Surprisingly, the two independent approaches identified functional downstream  
604 positions/region within the ANP32E promoter. Moreover, we ran the support vector  
605 regression (SVRb) model that was generated using *in vitro* transcription [55] on the  
606 +17 to +35 sequences of the wt and mutant promoters identified using the EM  
607 algorithm (S2 Table). Overall, our computational model was successful in making  
608 similar predictions (correlation coefficient ~0.75) as the SVRb model that used  
609 experimentally-based training data. Thus, both independently-performed studies  
610 complement each other, strengthening the notion that the downstream core promoter  
611 region contributes to transcriptional regulation of human promoters. Our mutational  
612 analysis highlights the importance of three specific nucleotides for the transcriptional  
613 output, as well the strict spacing requirement between the preferred downstream  
614 positions and the Inr motif, reminiscent of the *Drosophila* DPE.

615 To conclude, specific positions within the downstream core promoter region of  
616 human promoters are important for the transcriptional outcome; thus transcriptional  
617 regulation of human promoters via the downstream region is an important regulatory  
618 mechanism, likely conserved among metazoans but absent in other eukaryotes.

## 619 **Methods**

### 620 **Promoter sets**

621 The promoter sets and the corresponding dominant TSS positions were taken from  
622 EPDnew [56]: version 5 for *H. sapiens* and *D. melanogaster*; version 2 for *M.*  
623 *musculus*, *A. thaliana* and *S. cerevisiae*; version 1 for all other organisms studied.  
624 EPDnew promoter collections have been validated by hundreds of high-throughput  
625 sequencing experiments (i.e. CAGE), giving a very high confidence in identifying the  
626 correct transcription start site. For each gene, the promoter that was validated by the  
627 largest number of experiments was selected as the representative. This gave very  
628 high confidence for the positions of the initiation sites, and reduced the probability of  
629 selecting promoters used only in particular cell lines and/or conditions. Moreover, to  
630 reduce possible sequence bias by coding sequences, promoters that had translation  
631 start sites within the first 40 bases were discarded.

### 632 **Probabilistic partitioning basic algorithm**

633 In its basic structure, the algorithm is identical to the Expectation-Maximization (EM)  
634 algorithm presented in [57], which was originally designed for partitioning sets of  
635 genomic regions based on ChIP-seq data and represented as count data (integer)  
636 vectors and is described in Fig 1A. The adaptation to sequence data requires some  
637 modifications described below.

638 In the following, we adhere to the notation used in Stormo's review on specificity  
639 models of protein-DNA interactions [43]. Sequences of length  $N$  denoted  $S_i$  are  
640 represented as binary matrices with four rows corresponding to the bases A, C, G  
641 and T, and  $N$  columns corresponding to successive positions in the sequence. A  
642 matrix element  $S_i(b,j)$  has a value of 1, if base  $b$  occurs at the  $j$ th position of

643 sequence  $i$ , and a value of zero otherwise. A class  $C_k$  is represented by a matrix of  
 644 the same dimensions as the sequences, plus its occurrence probability  $p_k$ . A matrix  
 645 element  $C_k(b,j)$  contains the probability that base  $b$  occurs at the  $j$ th position of a  
 646 sequence belonging to class  $k$ . The probability of sequence  $S_i$  given class  $C_k$  is then  
 647 given by:

$$648 \quad P(S_i | C_k) = \prod_{b,j} C_k(b,j)^{S_i(b,j)} \quad (1)$$

649 The formula for computing the probability of class  $C_k$  given sequence  $S_i$  remains  
 650 unchanged:

$$651 \quad P(C_k | S_i) = \frac{p_k \cdot P(S_i | C_k)}{\sum_{k'} p_{k'} \cdot P(S_i | C_{k'})} \quad (2)$$

652 Using these probabilities, the base probability matrix for class  $C_k$  is updated in 2  
 653 steps:

$$654 \quad C_k^*(b,j) = \frac{\sum_i P(C_k | S_i) S_i(b,j)}{q_b} Z_{kj}^{-1} \quad C_k(b,j) = \frac{C_k^*(b,j) + w}{1 + 4w} \quad (3a, b)$$

655 Here,  $q_b$  denotes the frequency of base  $b$  in the input sequence set, and  $Z_{kj}$  is a  
 656 column specific normalization constant chosen such that the column  $j$  of base  
 657 probability matrix  $C_k$  sums to one. The first equation defines the MAP (maximum a  
 658 posteriori probability) estimation of the base probability matrix for each class  $k$ . The  
 659 second equation adds a small correction term to the MAP estimations that prevents  
 660 probabilities from converging to zero. Note however, that the algorithms returns  $C_j^*$  as



661 the final results after the last iteration. A small correction term  $x$  is also added the re-  
662 estimated class probabilities:

$$663 \quad p_k = \frac{\left(\frac{1}{N}\right)\left(\sum_i P(C_k | S_i)\right) + x}{1 + Kx} \quad (4)$$

664 The algorithm is initiated by a random seeding strategy. The probabilities of  
665 individual sequences of belonging to specific classes are sampled from a Beta  
666 distribution

$$667 \quad P(C_k | S_i) \sim \frac{\text{Beta}(\alpha, \beta)}{Z_i} \quad (5)$$

668 with shape parameters  $\alpha=0.01$  and  $\beta=1$ .  $Z_i$  is a sequence-specific normalization  
669 constant chosen such that the class probabilities for sequence  $i$  sum to one. The  
670 classes themselves are assigned equal probabilities  $p_k=1/K$ . After initializing these  
671 probabilities, the EM algorithm starts with equation 3.

## 672 **Probabilistic partitioning extended algorithm**

673 The extended partitioning algorithm (Fig 1B) features two innovations: (i) a two-state  
674 clustering strategy and (ii) a new, so-called "over-skewing" parameter  $\sigma$ . The two  
675 extensions are independent of each other, *i.e.* two-stage clustering can be used  
676 without over-skewing, and vice-versa. Two-stage clustering serves to increase the  
677 reproducibility of the results when initiating the algorithm with different random  
678 seeds. Over-skewing causes the algorithm to prefer partitionings with classes of

679 highly unequal sizes, typically a majority class plus a number of small classes with  
680 highly skewed base compositions.

681 With the two-stage clustering strategy, the basic EM algorithm is applied  $n$  times  
682 to produce  $n \times K$  subclasses. Each subclass is characterized as a base probability  
683 matrix henceforth referred to as a "motif". During the second stage, the motifs from  
684 the first stage are hierarchically clustered and subsequently partitioned into motif  
685 groups using a fixed height  $h$ . The  $K$  largest motif groups are retained, and a  
686 consensus base probability matrix  $C_k$  is computed for each group by averaging over  
687 all its members. Likewise, the  $p_k$  is computed as the average over the occurrence  
688 probabilities of all motifs belonging to group  $k$ . Hierarchical clustering was carried out  
689 with the R functions *dist* and *hclust*, using "Euclidean" as a distance measure, and  
690 "complete" as a clustering method. Tree partitioning was carried out with the R  
691 function *cutree*.

692

693

#### 694 **ATAC-seq analysis**

695

696 Average ATAC-seq footprints for promoter classes were produced with public data  
697 from human lymphoblastoid cell line GM12878 [58], and from *Drosophila* wild type  
698 eye-antennal imaginal disc [59], see supplementary material for GEO accession  
699 numbers and download URLs. We used processed versions of the data, i.e. read  
700 alignment files, available from the MGA repository [60]. Aggregation plots for the  
701 promoter classes shown in Figs 4 and 5A, B were generated via the web interface of  
702 the CHIP-Cor tool [61] using the following parameters: Reference feature *oriented*,  
703 target feature *any*, *centering* 4, window width 1, count cut-off 10, normalization  
704 *global*.

705

## 706 **Neighbor joining analysis**

707 Promoter sets of 10 organisms (*H. sapiens*, *M. musculus*, *D. rerio*, *C. elegans*, *D.*  
708 *melanogaster*, *A. mellifera*, *A. thaliana*, *Z. mays*, *S. cerevisiae*, *S. pombe*) were  
709 analyzed with the newly developed algorithm. In the first step (Figure 1A), 200  
710 iterations were applied by the probabilistic partitioning to generate 6 motifs. This  
711 procedure was independently repeated 50 times to generate 300 motifs for each  
712 specie (see Figure 1A for reference). The motifs were then hierarchically clustered,  
713 and the resulting tree was cut to obtain 10 clusters (Figure 1B). The 6 nodes with the  
714 highest number of motifs were then chosen and averaged to generate the final  
715 motifs. These motif collections were further clustered with Euclidean distance  
716 (functions 'dist', from package 'stats') and plotted using a Neighbor Joining tree  
717 (function 'nj' from package 'ape' [45]). The frequency matrices of motifs belonging to  
718 each of the 3 branches were averaged to generate the branch consensus.

719

## 720 **Plasmid construction**

721 For cloning the minimal promoters of the selected genes into a reporter plasmid,  
722 double-stranded oligonucleotides (IDT) comprising core promoter sequences from –  
723 10 to +40/+41 were inserted into the KpnI and SpeI sites of a pGL3-Basic plasmid  
724 with a modified polylinker. For each promoter, both WT and mutated preferred  
725 downstream positions (mPDP) (G>T at position +24, +28 and +29 relative to the  
726 relevant A<sub>+1</sub> position) versions were cloned. Primers used are listed in S3 Table. All  
727 generated constructs were verified by sequencing (Hy Labs).

## 728 **Cell culture, transient transfections and reporter gene assay**

729 Human Embryonic Kidney (HEK) 293 cells were cultured in DMEM high-glucose  
730 (Biological Industries) supplemented with 10% FBS, 0.1% penicillin-streptomycin,  
731 and 1% L-Glutamine, and grown at 37°C with 5% CO<sub>2</sub>.

732 For dual luciferase assays, 1-2x10<sup>6</sup> cells were plated per 60mm dish one day prior  
733 to transfection. Cells were transfected using the calcium phosphate method with a  
734 total of 3µg DNA (2.5µg firefly luciferase plasmid, 100ng of Thymidine Kinase-*Renilla*  
735 luciferase plasmid, and 400ng of pBlueScript plasmid) per 60mm dish. Prior to the  
736 transfection, the medium was changed to contain 25µM Chloroquine, and replaced  
737 with fresh medium 6-8 hours following the transfection. Cells were harvested 48  
738 hours post-transfection and assayed for dual-Luciferase activities as specified by the  
739 manufacturer (Promega). To correct for variations in transfection efficiency, the firefly  
740 luciferase activity of each sample was normalized to the corresponding *Renilla*  
741 luciferase activity. Each transfection was performed in triplicates, and each graph  
742 represents an average of 4 to 6 independent experiments ± SEM. Student's two-  
743 sided t-test was applied in order to determine the statistical significance of the  
744 observed difference.

745

## 746 **Acknowledgments**

747 We are indebted to Jim Kadonaga for his generous support and invaluable  
748 suggestions, and for sharing unpublished data. We thank Jim Kadonaga, Diana  
749 Ideses, Yehuda M. Danino, Orit Adato, Hadar Krap and Hodaya Komemi for critical  
750 reading of the manuscript.

751

752

## 753 References

- 754 1. Danino YM, Even D, Ideses D, Juven-Gershon T. The core promoter: At the  
755 heart of gene expression. *Biochimica et biophysica acta*. 2015;1849(8):1116-  
756 1131. doi: 10.1016/j.bbagr.2015.04.003. PubMed PMID: 25934543.
- 757 2. Haberle V, Stark A. Eukaryotic core promoters and the functional basis of  
758 transcription initiation. *Nat Rev Mol Cell Biol*. 2018. Epub 2018/06/28. doi:  
759 10.1038/s41580-018-0028-8. PubMed PMID: 29946135.
- 760 3. Lenhard B, Sandelin A, Carninci P. Metazoan promoters: emerging  
761 characteristics and insights into transcriptional regulation. *Nature reviews*  
762 *Genetics*. 2012;13(4):233-245. doi: 10.1038/nrg3163. PubMed PMID: 22392219.
- 763 4. Thomas MC, Chiang CM. The general transcription machinery and general  
764 cofactors. *Critical Reviews in Biochemistry and Molecular Biology*.  
765 2006;41(3):105-178. doi: 10.1080/10409230600648736. PubMed PMID:  
766 WOS:000237768300001.
- 767 5. Vo Ngoc L, Wang YL, Kassavetis GA, Kadonaga JT. The punctilious RNA  
768 polymerase II core promoter. *Genes Dev*. 2017;31(13):1289-1301. Epub  
769 2017/08/16. doi: 10.1101/gad.303149.117. PubMed PMID: 28808065.
- 770 6. Bajic VB, Tan SL, Christoffels A, Schonbach C, Lipovich L, Yang L, et al. Mice  
771 and men: their promoter properties. *PLoS Genet*. 2006;2(4):e54. Epub  
772 2006/05/10. doi: 10.1371/journal.pgen.0020054. PubMed PMID: 16683032.
- 773 7. Carninci P, Sandelin A, Lenhard B, Katayama S, Shimokawa K, Ponjavic J, et al.  
774 Genome-wide analysis of mammalian promoter architecture and evolution. *Nat*  
775 *Genet*. 2006;38(6):626-635. Epub 2006/04/29. doi: 10.1038/ng1789. PubMed  
776 PMID: 16645617.
- 777 8. Cooper SJ, Trinklein ND, Anton ED, Nguyen L, Myers RM. Comprehensive  
778 analysis of transcriptional promoter structure and function in 1% of the human  
779 genome. *Genome Res*. 2006;16(1):1-10. doi: 10.1101/gr.4222606. PubMed  
780 PMID: 16344566.
- 781 9. Kim TH, Barrera LO, Zheng M, Qu C, Singer MA, Richmond TA, et al. A high-  
782 resolution map of active promoters in the human genome. *Nature*.  
783 2005;436(7052):876-880. Epub 2005/07/01. doi: nature03877 [pii]  
784 10.1038/nature03877. PubMed PMID: 15988478.
- 785 10. Dreos R, Ambrosini G, Bucher P. Influence of Rotational Nucleosome  
786 Positioning on Transcription Start Site Selection in Animal Promoters. *PLoS*  
787 *Comput Biol*. 2016;12(10):e1005144. Epub 2016/10/08. doi:  
788 10.1371/journal.pcbi.1005144. PubMed PMID: 27716823.
- 789 11. Dikstein R. The unexpected traits associated with core promoter elements.  
790 *Transcription*. 2011;2(5):201-206. Epub 2012/01/11. doi: 10.4161/trns.2.5.17271  
791 17271 [pii]. PubMed PMID: 22231114.
- 792 12. Heintzman ND, Ren B. The gateway to transcription: identifying, characterizing  
793 and understanding promoters in the eukaryotic genome. *Cell Mol Life Sci*.  
794 2007;64(4):386-400. Epub 2006/12/16. doi: 10.1007/s00018-006-6295-0.  
795 PubMed PMID: 17171231.
- 796 13. Butler JE, Kadonaga JT. Enhancer-promoter specificity mediated by DPE or  
797 TATA core promoter motifs. *Genes Dev*. 2001;15(19):2515-2519. Epub  
798 2001/10/03. doi: 10.1101/gad.924301. PubMed PMID: 11581157.
- 799 14. Juven-Gershon T, Cheng S, Kadonaga JT. Rational design of a super core  
800 promoter that enhances gene expression. *Nature methods*. 2006;3(11):917-922.  
801 doi: 10.1038/nmeth937. PubMed PMID: 17124735.

- 802 15. Zabidi MA, Arnold CD, Schernhuber K, Pagani M, Rath M, Frank O, et al.  
803 Enhancer-core-promoter specificity separates developmental and housekeeping  
804 gene regulation. *Nature*. 2015;518(7540):556-559. Epub 2014/12/18. doi:  
805 10.1038/nature13994. PubMed PMID: 25517091.
- 806 16. Zehavi Y, Sloutskin A, Kuznetsov O, Juven-Gershon T. The core promoter  
807 composition establishes a new dimension in developmental gene networks.  
808 *Nucleus*. 2014;5(4):298-303. Epub 2014/12/09. doi: 10.4161/nucl.29838.  
809 PubMed PMID: 25482118.
- 810 17. Ohler U, Wassarman DA. Promoting developmental transcription. *Development*.  
811 2010;137(1):15-26. doi: 10.1242/dev.035493. PubMed PMID: 20023156.
- 812 18. Deng W, Roberts SG. TFIIB and the regulation of transcription by RNA  
813 polymerase II. *Chromosoma*. 2007;116(5):417-429. Epub 2007/06/27. doi:  
814 10.1007/s00412-007-0113-9. PubMed PMID: 17593382.
- 815 19. Burke TW, Kadonaga JT. Drosophila TFIID binds to a conserved downstream  
816 basal promoter element that is present in many TATA-box-deficient promoters.  
817 *Genes Dev*. 1996;10(6):711-724. Epub 1996/03/15. PubMed PMID: 8598298.
- 818 20. Burke TW, Kadonaga JT. The downstream core promoter element, DPE, is  
819 conserved from Drosophila to humans and is recognized by TAFII60 of  
820 Drosophila. *Genes Dev*. 1997;11(22):3020-3031. doi: 10.1101/gad.11.22.3020.  
821 PubMed PMID: 9367984.
- 822 21. Lim CY, Santoso B, Boulay T, Dong E, Ohler U, Kadonaga JT. The MTE, a new  
823 core promoter element for transcription by RNA polymerase II. *Genes Dev*.  
824 2004;18(13):1606-1617. doi: 10.1101/gad.1193404. PubMed PMID: 15231738.
- 825 22. Theisen JW, Lim CY, Kadonaga JT. Three key subregions contribute to the  
826 function of the downstream RNA polymerase II core promoter. *Mol Cell Biol*.  
827 2010;30(14):3471-3479. doi: 10.1128/MCB.00053-10. PubMed PMID:  
828 20457814.
- 829 23. Shir-Shapira H, Sloutskin A, Adato O, Ovadia-Shochat A, Ideses D, Zehavi Y, et  
830 al. Identification of evolutionarily conserved downstream core promoter elements  
831 required for the transcriptional regulation of Fushi tarazu target genes. *PloS one*.  
832 2019;14(4):e0215695. doi: 10.1371/journal.pone.0215695. PubMed PMID:  
833 30998799.
- 834 24. Hsu JY, Juven-Gershon T, Marr MT, 2nd, Wright KJ, Tjian R, Kadonaga JT.  
835 TBP, Mot1, and NC2 establish a regulatory circuit that controls DPE-dependent  
836 versus TATA-dependent transcription. *Genes Dev*. 2008;22(17):2353-2358.  
837 Epub 2008/08/16. doi: 10.1101/gad.1681808. PubMed PMID: 18703680.
- 838 25. Juven-Gershon T, Hsu JY, Kadonaga JT. Caudal, a key developmental  
839 regulator, is a DPE-specific transcriptional factor. *Genes Dev*. 2008;22(20):2823-  
840 2830. Epub 2008/10/17. doi: 10.1101/gad.1698108. PubMed PMID: 18923080.
- 841 26. Zehavi Y, Kuznetsov O, Ovadia-Shochat A, Juven-Gershon T. Core promoter  
842 functions in the regulation of gene expression of Drosophila dorsal target genes.  
843 *J Biol Chem*. 2014;289(17):11993-12004. Epub 2014/03/19. doi:  
844 10.1074/jbc.M114.550251. PubMed PMID: 24634215.
- 845 27. Kedmi A, Zehavi Y, Glick Y, Orenstein Y, Ideses D, Wachtel C, et al. Drosophila  
846 TRF2 is a preferential core promoter regulator. *Genes Dev*. 2014;28(19):2163-  
847 2174. Epub 2014/09/17. doi: 10.1101/gad.245670.114. PubMed PMID:  
848 25223897.
- 849 28. Kutach AK, Kadonaga JT. The downstream promoter element DPE appears to  
850 be as widely used as the TATA box in Drosophila core promoters. *Mol Cell Biol*.

- 851 2000;20(13):4754-4764. Epub 2000/06/10. doi: 10.1128/mcb.20.13.4754-  
852 4764.2000. PubMed PMID: 10848601.
- 853 29. Willy PJ, Kobayashi R, Kadonaga JT. A basal transcription factor that activates  
854 or represses transcription. *Science*. 2000;290(5493):982-985. Epub 2000/11/04.  
855 doi: 10.1126/science.290.5493.982. PubMed PMID: 11062130.
- 856 30. Ohler U, Liao GC, Niemann H, Rubin GM. Computational analysis of core  
857 promoters in the Drosophila genome. *Genome Biol*.  
858 2002;3(12):RESEARCH0087. Epub 2003/01/23. doi: 10.1186/gb-2002-3-12-  
859 research0087. PubMed PMID: 12537576.
- 860 31. Rach EA, Yuan HY, Majoros WH, Tomancak P, Ohler U. Motif composition,  
861 conservation and condition-specificity of single and alternative transcription start  
862 sites in the Drosophila genome. *Genome Biol*. 2009;10(7):R73. Epub  
863 2009/07/11. doi: 10.1186/gb-2009-10-7-r73  
864 gb-2009-10-7-r73 [pii]. PubMed PMID: 19589141.
- 865 32. Ohler U. Identification of core promoter modules in Drosophila and their  
866 application in accurate transcription start site prediction. *Nucleic acids research*.  
867 2006;34(20):5943-5950. Epub 2006/10/28. doi: 10.1093/nar/gkl608. PubMed  
868 PMID: 17068082.
- 869 33. Duttke SH. RNA polymerase III accurately initiates transcription from RNA  
870 polymerase II promoters in vitro. *J Biol Chem*. 2014;289(29):20396-20404. Epub  
871 2014/06/12. doi: 10.1074/jbc.M114.563254. PubMed PMID: 24917680.
- 872 34. Zhou T, Chiang CM. The intronless and TATA-less human TAF(II)55 gene  
873 contains a functional initiator and a downstream promoter element. *J Biol Chem*.  
874 2001;276(27):25503-25511. Epub 2001/05/08. doi: 10.1074/jbc.M102875200.  
875 PubMed PMID: 11340078.
- 876 35. Bhuiyan T, Timmers HTM. Promoter Recognition: Putting TFIID on the Spot.  
877 *Trends Cell Biol*. 2019;29(9):752-763. Epub 2019/07/14. doi:  
878 10.1016/j.tcb.2019.06.004. PubMed PMID: 31300188.
- 879 36. Cramer P. Organization and regulation of gene transcription. *Nature*.  
880 2019;573(7772):45-54. Epub 2019/08/30. doi: 10.1038/s41586-019-1517-4.  
881 PubMed PMID: 31462772.
- 882 37. Patel AB, Greber BJ, Nogales E. Recent insights into the structure of TFIID, its  
883 assembly, and its binding to core promoter. *Curr Opin Struct Biol*. 2019;61:17-  
884 24. Epub 2019/11/22. doi: 10.1016/j.sbi.2019.10.001. PubMed PMID: 31751889.
- 885 38. Roeder RG. 50+ years of eukaryotic transcription: an expanding universe of  
886 factors and mechanisms. *Nat Struct Mol Biol*. 2019;26(9):783-791. Epub  
887 2019/08/24. doi: 10.1038/s41594-019-0287-x. PubMed PMID: 31439941.
- 888 39. Verrijzer CP, Chen JL, Yokomori K, Tjian R. Binding of TAFs to core elements  
889 directs promoter selectivity by RNA polymerase II. *Cell*. 1995;81(7):1115-1125.  
890 Epub 1995/06/30. doi: 10.1016/s0092-8674(05)80016-9. PubMed PMID:  
891 7600579.
- 892 40. Even DY, Kedmi A, Basch-Barzilay S, Ideses D, Tikotzki R, Shir-Shapira H, et al.  
893 Engineered Promoters for Potent Transient Overexpression. *PloS one*.  
894 2016;11(2):e0148918. doi: 10.1371/journal.pone.0148918. PubMed PMID:  
895 26872062.
- 896 41. Cianfrocco MA, Kassavetis GA, Grob P, Fang J, Juven-Gershon T, Kadonaga  
897 JT, et al. Human TFIID binds to core promoter DNA in a reorganized structural  
898 state. *Cell*. 2013;152(1-2):120-131. doi: 10.1016/j.cell.2012.12.005. PubMed  
899 PMID: 23332750.

- 900 42. Louder RK, He Y, Lopez-Blanco JR, Fang J, Chacon P, Nogales E. Structure of  
901 promoter-bound TFIID and model of human pre-initiation complex assembly.  
902 *Nature*. 2016;531(7596):604-609. Epub 2016/03/24. doi: 10.1038/nature17394.  
903 PubMed PMID: 27007846.
- 904 43. Stormo GD. Modeling the specificity of protein-DNA interactions. *Quant Biol*.  
905 2013;1(2):115-130. Epub 2014/07/22. doi: 10.1007/s40484-013-0012-4. PubMed  
906 PMID: 25045190.
- 907 44. Frith MC, Valen E, Krogh A, Hayashizaki Y, Carninci P, Sandelin A. A code for  
908 transcription initiation in mammalian genomes. *Genome Res*. 2008;18(1):1-12.  
909 Epub 2007/11/23. doi: 10.1101/gr.6831208. PubMed PMID: 18032727.
- 910 45. Parry TJ, Theisen JW, Hsu JY, Wang YL, Corcoran DL, Eustice M, et al. The  
911 TCT motif, a key component of an RNA polymerase II transcription system for  
912 the translational machinery. *Genes Dev*. 2010;24(18):2013-2018. Epub  
913 2010/08/31. doi: 10.1101/gad.1951110. PubMed PMID: 20801935.
- 914 46. Sloutskin A, Danino YM, Orenstein Y, Zehavi Y, Doniger T, Shamir R, et al.  
915 ElemeNT: a computational tool for detecting core promoter elements.  
916 *Transcription*. 2015;6(3):41-50. doi: 10.1080/21541264.2015.1067286. PubMed  
917 PMID: 26226151.
- 918 47. Lubliner S, Regev I, Lotan-Pompan M, Edelheit S, Weinberger A, Segal E. Core  
919 promoter sequence in yeast is a major determinant of expression level. *Genome*  
920 *Res*. 2015;25(7):1008-1017. Epub 2015/05/15. doi: 10.1101/gr.188193.114.  
921 PubMed PMID: 25969468.
- 922 48. Zhou T, Chiang CM. Sp1 and AP2 regulate but do not constitute TATA-less  
923 human TAF(II)55 core promoter activity. *Nucleic acids research*.  
924 2002;30(19):4145-4157. Epub 2002/10/05. doi: 10.1093/nar/gkf537. PubMed  
925 PMID: 12364593.
- 926 49. Gershenzon NI, Ioshikhes IP. Synergy of human Pol II core promoter elements  
927 revealed by statistical sequence analysis. *Bioinformatics*. 2005;21(8):1295-1300.  
928 Epub 2004/12/02. doi: bti172 [pii]  
929 10.1093/bioinformatics/bti172. PubMed PMID: 15572469.
- 930 50. Patel AB, Louder RK, Greber BJ, Grunberg S, Luo J, Fang J, et al. Structure of  
931 human TFIID and mechanism of TBP loading onto promoter DNA. *Science*.  
932 2018;362(6421). doi: 10.1126/science.aau8872. PubMed PMID: 30442764.
- 933 51. Shao W, Zeitlinger J. Paused RNA polymerase II inhibits new transcriptional  
934 initiation. *Nat Genet*. 2017;49(7):1045-1051. Epub 2017/05/16. doi:  
935 10.1038/ng.3867. PubMed PMID: 28504701.
- 936 52. Vo Ngoc L, Kassavetis GA, Kadonaga JT. The RNA Polymerase II Core  
937 Promoter in *Drosophila*. *Genetics*. 2019;212(1):13-24. doi:  
938 10.1534/genetics.119.302021. PubMed PMID: 31053615.
- 939 53. Hetzel J, Duttke SH, Benner C, Chory J. Nascent RNA sequencing reveals  
940 distinct features in plant transcription. *Proc Natl Acad Sci U S A*.  
941 2016;113(43):12316-12321. Epub 2016/10/30. doi: 10.1073/pnas.1603217113.  
942 PubMed PMID: 27729530.
- 943 54. Barbosa C, Peixeiro I, Romao L. Gene expression regulation by upstream open  
944 reading frames and human disease. *PLoS Genet*. 2013;9(8):e1003529. Epub  
945 2013/08/21. doi: 10.1371/journal.pgen.1003529. PubMed PMID: 23950723.
- 946 55. Vo Ngoc L, Huang CY, Cassidy CJ, Medrano C, Kadonaga JT. Identification of  
947 the human DPR core promoter element using machine learning. *Nature*. 2020.  
948 Epub 2020/09/11. doi: 10.1038/s41586-020-2689-7. PubMed PMID: 32908305.



- 949 56. Dreos R, Ambrosini G, Groux R, Cavin Perier R, Bucher P. The eukaryotic  
950 promoter database in its 30th year: focus on non-vertebrate organisms. *Nucleic*  
951 *acids research*. 2017;45(D1):D51-D55. Epub 2016/12/03. doi:  
952 10.1093/nar/gkw1069. PubMed PMID: 27899657.
- 953 57. Nair NU, Kumar S, Moret BM, Bucher P. Probabilistic partitioning methods to find  
954 significant patterns in ChIP-Seq data. *Bioinformatics*. 2014;30(17):2406-2413.  
955 Epub 2014/05/09. doi: 10.1093/bioinformatics/btu318. PubMed PMID: 24812341.
- 956 58. Buenrostro JD, Giresi PG, Zaba LC, Chang HY, Greenleaf WJ. Transposition of  
957 native chromatin for fast and sensitive epigenomic profiling of open chromatin,  
958 DNA-binding proteins and nucleosome position. *Nature methods*.  
959 2013;10(12):1213-1218. Epub 2013/10/08. doi: 10.1038/nmeth.2688. PubMed  
960 PMID: 24097267.
- 961 59. Davie K, Jacobs J, Atkins M, Potier D, Christiaens V, Halder G, et al. Discovery  
962 of transcription factors and regulatory regions driving in vivo tumor development  
963 by ATAC-seq and FAIRE-seq open chromatin profiling. *PLoS Genet*.  
964 2015;11(2):e1004994. Epub 2015/02/14. doi: 10.1371/journal.pgen.1004994.  
965 PubMed PMID: 25679813.
- 966 60. Dreos R, Ambrosini G, Groux R, Perier RC, Bucher P. MGA repository: a  
967 curated data resource for ChIP-seq and other genome annotated data. *Nucleic*  
968 *acids research*. 2018;46(D1):D175-D180. Epub 2017/10/27. doi:  
969 10.1093/nar/gkx995. PubMed PMID: 29069466.
- 970 61. Ambrosini G, Dreos R, Kumar S, Bucher P. The ChIP-Seq tools and web server:  
971 a resource for analyzing ChIP-seq and other types of genomic data. *BMC*  
972 *Genomics*. 2016;17(1):938. Epub 2016/11/20. doi: 10.1186/s12864-016-3288-8.  
973 PubMed PMID: 27863463.
- 974 62. Vo Ngoc L, Huang CY, Cassidy CJ, Medrano C, Kadonaga JT. Identification of  
975 the human DPR core promoter element using machine learning. *Nature*.  
976 2020;585(7825):459-463. Epub 2020/09/11. doi: 10.1038/s41586-020-2689-7.  
977 PubMed PMID: 32908305.
- 978

979

980 **Supporting information**

981 **Public data used**

982 ATAC-seq data for human lymphoblastoid cell line GM12878:

983 Source data: GEO series GSE47753, samples GSM1155957, GSM1155958,

984 GSM1155959, GSM1155960

985 Processed data: MGA series buenrostro13, sample GM12878|ATACseq|50K|short

986 [ftp://ccg.epfl.ch/mga/hg19/buenrostro13/GM12878\\_50K.oriented.sga](ftp://ccg.epfl.ch/mga/hg19/buenrostro13/GM12878_50K.oriented.sga)

987

988 ATAC-seq data for *Drosophila* wild type eye-antennal imaginal disc:

989 Source data: GEO series GSE59078, sample GSM1426261

990 Processed data: MGA series dm6/davie15/, sample WT|FAIRE|Control

991 <ftp://ccg.epfl.ch/mga/dm6/davie15/GSM1426261.sga>

992

993

994

995

996 **S1 Table. Three bp periodic distributions of ATG in human promoter classes 4-**

997 **6.**

998

| Position      | Class 4 | Class 5 | Class 6 |
|---------------|---------|---------|---------|
| +9            | 0       | 4       | 8       |
| +10           | 12      | 0       | 4       |
| +11           | 3       | 5       | 0       |
| +12           | 0       | 1       | 5       |
| +13           | 13      | 1       | 0       |
| +14           | 5       | 8       | 0       |
| +15           | 0       | 3       | 10      |
| +16           | 9       | 0       | 6       |
| +17           | 3       | 8       | 0       |
| +9, +12, +15  | 0       | 8       | 23      |
| +10, +13, +16 | 34      | 1       | 10      |
| +11, +14, +17 | 11      | 21      | 0       |

999

1000

1001

1002

1003

1004

1005

**S2 Table. The EM algorithm (this study) makes similar predictions as the SVRb model [62].**

| Human promoter | Sequence (+17 to +35) | Class 3 (EM) log score | SVRb score |
|----------------|-----------------------|------------------------|------------|
| LRCH4          | CCGCCGGGAGCGGATGGCG   | 5.19                   | 6.15       |
| LRCH4_mPDP     | CCGCCGGTAGCTTATGGCG   | 0.61                   | 0.98       |
| LRCH4_mGG      | CCGCCGGGAGCGGATGGCT   | 5.20                   | 7.16       |
| LRCH4_pos10_m2 | GCCGGGAGCGGATGGCGGC   | -4.55                  | 1.19       |
| LRCH4_pos10_p2 | AGCCGCCGGGAGCGGATGG   | -0.79                  | 0.99       |
| LRCH4_pos18_m2 | CCCGGGAGCGGATGGCGGC   | -4.24                  | 0.55       |
| LRCH4_pos18_p2 | CCTCGCCGGGAGCGGATGG   | -0.16                  | 0.12       |
| CKS2           | TTGCCTGGGCTGGACGTGG   | 2.95                   | 7.97       |
| CKS2_mPDP      | TTGCCTGTGCTTTACGTGG   | -1.63                  | 1.52       |
| CKS2_mGG       | TTGCCTGGGCTGGACGTTT   | 2.96                   | 8.83       |
| CKS2_pos10_m2  | GCCTGGGCTGGACGTGGTT   | -2.41                  | 1.69       |
| CKS2_pos10_p2  | TGTTGCCTGGGCTGGACGT   | -8.95                  | 0.67       |
| CKS2_pos18_m2  | TCCTGGGCTGGACGTGGTT   | -2.26                  | 1.38       |
| CKS2_pos18_p2  | TTTCGCCTGGGCTGGACGT   | -8.47                  | 1.23       |
| ANP32E         | TTGAAGGGGAAGGAAGTGC   | 5.51                   | 12.89      |
| ANP32E_mPDP    | TTGAAGGTGAATTAAGTGC   | 0.94                   | 3.17       |
| CELF1          | CAGCGGCGGCGGGACGCGG   | 2.81                   | 5.44       |
| CELF1_mPDP     | CAGCGGCTGCGTTACGCGG   | -1.76                  | 1.56       |
| CTSA           | CTGGAGAGCAAGGACGCGG   | 3.81                   | 8.45       |
| CTSA_mPDP      | CTGGAGATCAATTACGCGG   | -0.77                  | 1.36       |

1006

1007

1008

1009

1010

Columns 3 (EM algorithm, class 3 log score) and 4 (SVRb) correlate with a coefficient of about 0.75.

1011

1012 **S3 Table. Primers used to generate the examined promoters.**

1013

| Primer name           | sequence (5' to 3')                                                         |
|-----------------------|-----------------------------------------------------------------------------|
| LRCH4_wt_Top          | CCGGTCCCCTCAGTCAGGCAGCGGGAGCCCGGGAGCGGATGGCGGCGGCA                          |
| LRCH4_wt_bottom       | CTAGTGCCCGCCCATCCGCTCCCGGCGGCTCCCGCTGCCTGACTGACGGGACC<br>GGGTAC             |
| LRCH4_mPDP_Top        | CCGGTCCCCTCAGTCAGGCAGCGGGAGCCCGGGAGCGGtAGCttATGGCGGCGGCA                    |
| LRCH4_mPDP_bottom     | CTAGTGCCCGCCCATaaGCTaCCGGCGGCTCCCGCTGCCTGACTGACGGGACC<br>GGGTAC             |
| LRCH4_pos10_m2_Top    | CCGGTCCCCTCAGTCAGGCAGGGAGCCCGGGAGCGGATGGCGGCGGC<br>A                        |
| LRCH4_pos10_m2_bottom | CTAGTGCCCGCCCATCCGCTCCCGGCGGCTCCCTGCCTGACTGACGGG<br>ACCGGGTAC               |
| LRCH4_pos10_p2_Top    | CCGGTCCCCTCAGTCAGGCAG <b>tc</b> CGGGAGCCCGGGAGCGGATGGCGG<br>CGGCA           |
| LRCH4_pos10_p2_bottom | CTAGTGCCCGCCCATCCGCTCCCGGCGGCTCCCG <b>gact</b> GCCTGACTGA<br>CGGGACCGGGTAC  |
| LRCH4_pos18_m2_Top    | CCGGTCCCCTCAGTCAGGCAGCGGGAGCCCGGGAGCGGATGGCGGCGGC<br>A                      |
| LRCH4_pos18_m2_bottom | CTAGTGCCCGCCCATCCGCTCCCGGGCTCCCGCTGCCTGACTGACGGG<br>ACCGGGTAC               |
| LRCH4_pos18_p2_Top    | CCGGTCCCCTCAGTCAGGCAGCGGGAGCC <b>tc</b> GCCGGGAGCGGATGGCGG<br>CGGCA         |
| LRCH4_pos18_p2_bottom | CTAGTGCCCGCCCATCCGCTCCCGGC <b>gagg</b> GCTCCCGCTGCCTGACTGA<br>CGGGACCGGGTAC |
| LRCH4_mGG_Top         | CCGGTCCCCTCAGTCAGGCAGCGGGAGCCCGGGAGCGGATGGC <b>tt</b> CG<br>GCA             |
| LRCH4_mGG_bottom      | CTAGTGCC <b>gaa</b> GCCATCCGCTCCCGGCGGCTCCCGCTGCCTGACTGACG<br>GGACCGGGTAC   |
| ANP32E_wt_Top         | CATGGAGGCTCAGTCTCTGAGCAGCCATTGAAGGGGAAGGAACTGCGGG<br>TGA                    |
| ANP32E_wt_bottom      | CTAGTCACCCGCAGTTCCTTCCCCTTCAATGGCTGCTCAGAGACTGAGC<br>CTCCATGGTAC            |
| ANP32E_mPDP_Top       | CATGGAGGCTCAGTCTCTGAGCAGCCATTGAAGGtGAAttAACTGCGGG<br>TGA                    |
| ANP32E_mPDP_bottom    | CTAGTCACCCGCAGTaaATTCaCCTTCAATGGCTGCTCAGAGACTGAGC<br>CTCCATGGTAC            |
| CKS2_wt_Top           | CTGCGGTCGTTAGTCTCCGGCGAGTTGTTGCCTGGGCTGGACGTGGTTTT<br>TGTA                  |
| CKS2_wt_bottom        | CTAGTACAAAACCACGTCCAGCCCAGGCAACAACCTCGCCGGAGACTAAC<br>GACCGCAGGTAC          |
| CKS2_mPDP_Top         | CTGCGGTCGTTAGTCTCCGGCGAGTTGTTGCCTGtGCTttACGTGGTTTT<br>TGTA                  |
| CKS2_mPDP_bottom      | CTAGTACAAAACCACGTaaAGCaCAGGCAACAACCTCGCCGGAGACTAAC<br>GACCGCAGGTAC          |
| CKS2_pos10_m2_Top     | CTGCGGTCGTTAGTCTCCGGAGTTGTTGCCTGGGCTGGACGTGGTTTTG<br>TA                     |
| CKS2_pos10_m2_bottom  | CTAGTACAAAACCACGTCCAGCCCAGGCAACAACCTCCGGAGACTAACGA<br>CCGCAGGTAC            |
| CKS2_pos10_p2_Top     | CTGCGGTCGTTAGTCTCCGGC <b>tc</b> GAGTTGTTGCCTGGGCTGGACGTGGT<br>TTTTGTA       |

|                          |                                                                                        |
|--------------------------|----------------------------------------------------------------------------------------|
| CKS2_pos10_p2_bot<br>tom | CTAGTACAAAACCACGTCCAGCCCAGGCAACAAC <b>TCga</b> GCCGGAGACTA<br>ACGACCGCAGGTAC           |
| CKS2_pos18_m2_To<br>p    | CTGCGGTCGTTAGTCTCCGGCGAGTTGTCCTGGGCTGGACGTGGTTTTG<br>TA                                |
| CKS2_pos18_m2_bo<br>ttom | CTAGTACAAAACCACGTCCAGCCCAGGACAAC <b>TCG</b> CCCGGAGACTAACGA<br>CCGCAGGTAC              |
| CKS2_pos18_p2_To<br>p    | CTGCGGTCGTTAGTCTCCGGCGAGTTGTT <b>tc</b> GCCTGGGCTGGACGTGGT<br>TTTTGTA                  |
| CKS2_pos18_p2_bot<br>tom | CTAGTACAAAACCACGTCCAGCCCAGG <b>CGa</b> AACAAC <b>TCG</b> CCCGGAGACTA<br>ACGACCGCAGGTAC |
| CKS2_mGG_Top             | CTGCGGTCGTTAGTCTCCGGCGAGTTGTTGCCTGGGCTGGACGT <b>tt</b> TTT<br>TGTA                     |
| CKS2_mGG_bottom          | CTAGTACAAAA <b>aa</b> ACGTCCAGCCCAGGCAACAAC <b>TCG</b> CCCGGAGACTAAC<br>GACCGCAGGTAC   |
| CELF1_wt_Top             | CGGGGTGTTCTGCTCTGGCGGCAGCGGCAGCGGGCGGGACGCGGAGG<br>CTCA                                |
| CELF1_wt_bottom          | CTAGTGAGCCTCCGCGTCCCGCCCGCTGCCGCTGCCGCCAGAGCAGA<br>ACACCCCGGTAC                        |
| CELF1_mPDP_Top           | CGGGGTGTTCTGCTCTGGCGGCAGCGGCAGCGGctGCGttACGCGGAGGCTCA                                  |
| CELF1_mPDP_botto<br>m    | CTAGTGAGCCTCCGCGTaaCGCaGCCGCTGCCGCTGCCGCCAGAGCAGAACACC<br>CCGGTAC                      |
| CTSA_wt_Top              | CCATGACTTCCAGTCCCCGGGCGCCTCCTGGAGAGCAAGGACGCGGGGGAGCA                                  |
| CTSA_wt_bottom           | CTAGTGCTCCCCCGCGTCCTTGCTCTCCAGGAGGCGCCCGGGGACTGGAAGTCA<br>TGGGTAC                      |
| CTSA_mPDP_Top            | CCATGACTTCCAGTCCCCGGGCGCCTCCTGGAGAtCAAttACGCGGGGGAGCA                                  |
| CTSA_mPDP_botto<br>m     | CTAGTGCTCCCCCGCGTaaTTGaTCTCCAGGAGGCGCCCGGGGACTGGAAGTCA<br>TGGGTAC                      |

1014

1015 Primers comprising minimal core promoter sequences containing additional  
 1016 nucleotides in order to be ligated (following the annealing of top and bottom  
 1017 oligonucleotides) into a pGL3-Basic vector with a modified polylinker, digested with  
 1018 KpnI and SpeI restriction enzymes. Nucleotides added in the p2 promoters or  
 1019 mutated in the mGG promoters are depicted in bold lowercase letters.  
 1020

1021

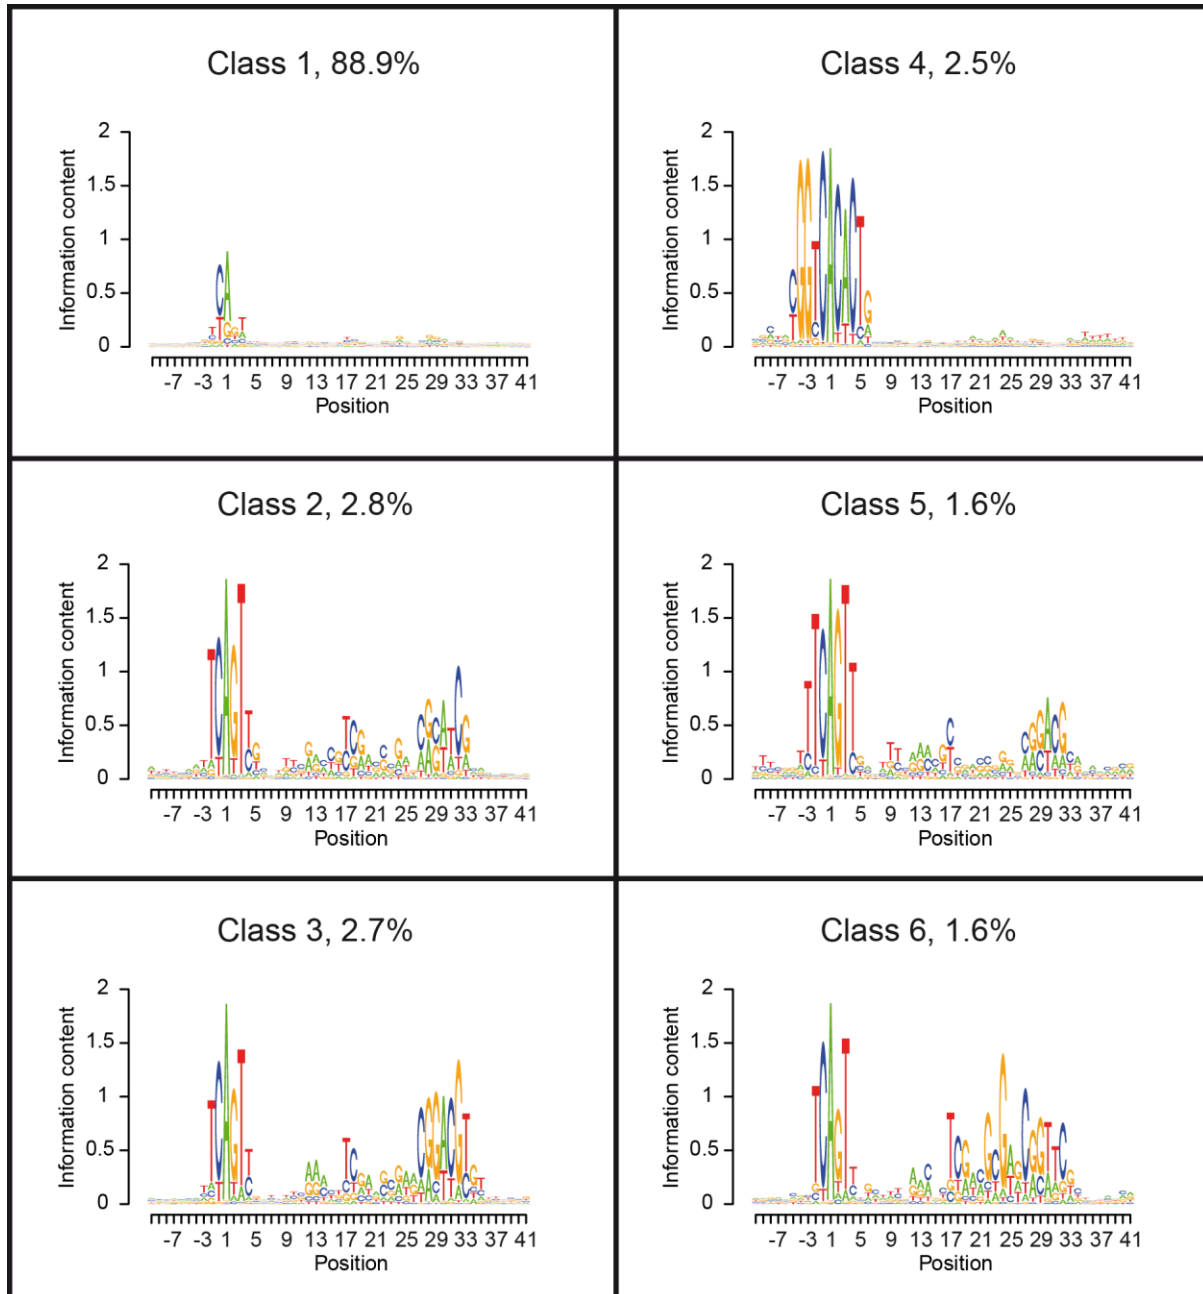

1022

1023

1024

1025

1026

**S1 Fig. Partitioning of *Drosophila* promoter sequences with the extended EM algorithm.**

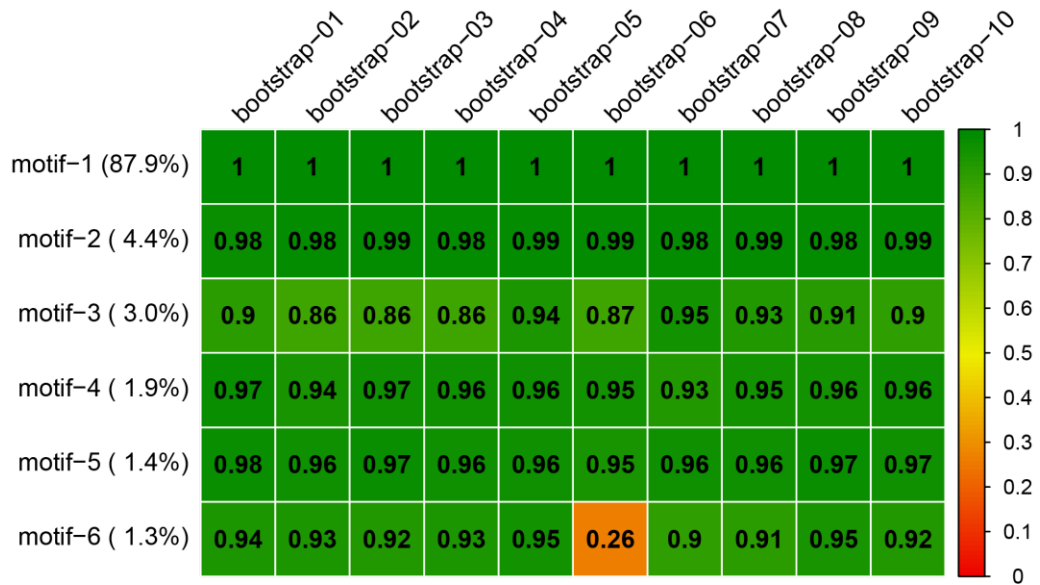

1027  
1028  
1029  
1030  
1031  
1032  
1033  
1034  
1035  
1036

**S2 Fig. Bootstrap analysis of human promoter classes.** The complete promoter sequence collection was resampled 10 times. The extended partitioning algorithm was applied to the bootstrapped data sets retaining the 10 most frequently found classes. The heatmap reflects the similarity (expressed as Pearson correlation coefficients) of the newly identified motifs with the corresponding most similar motifs found in each bootstrapping round.

1037

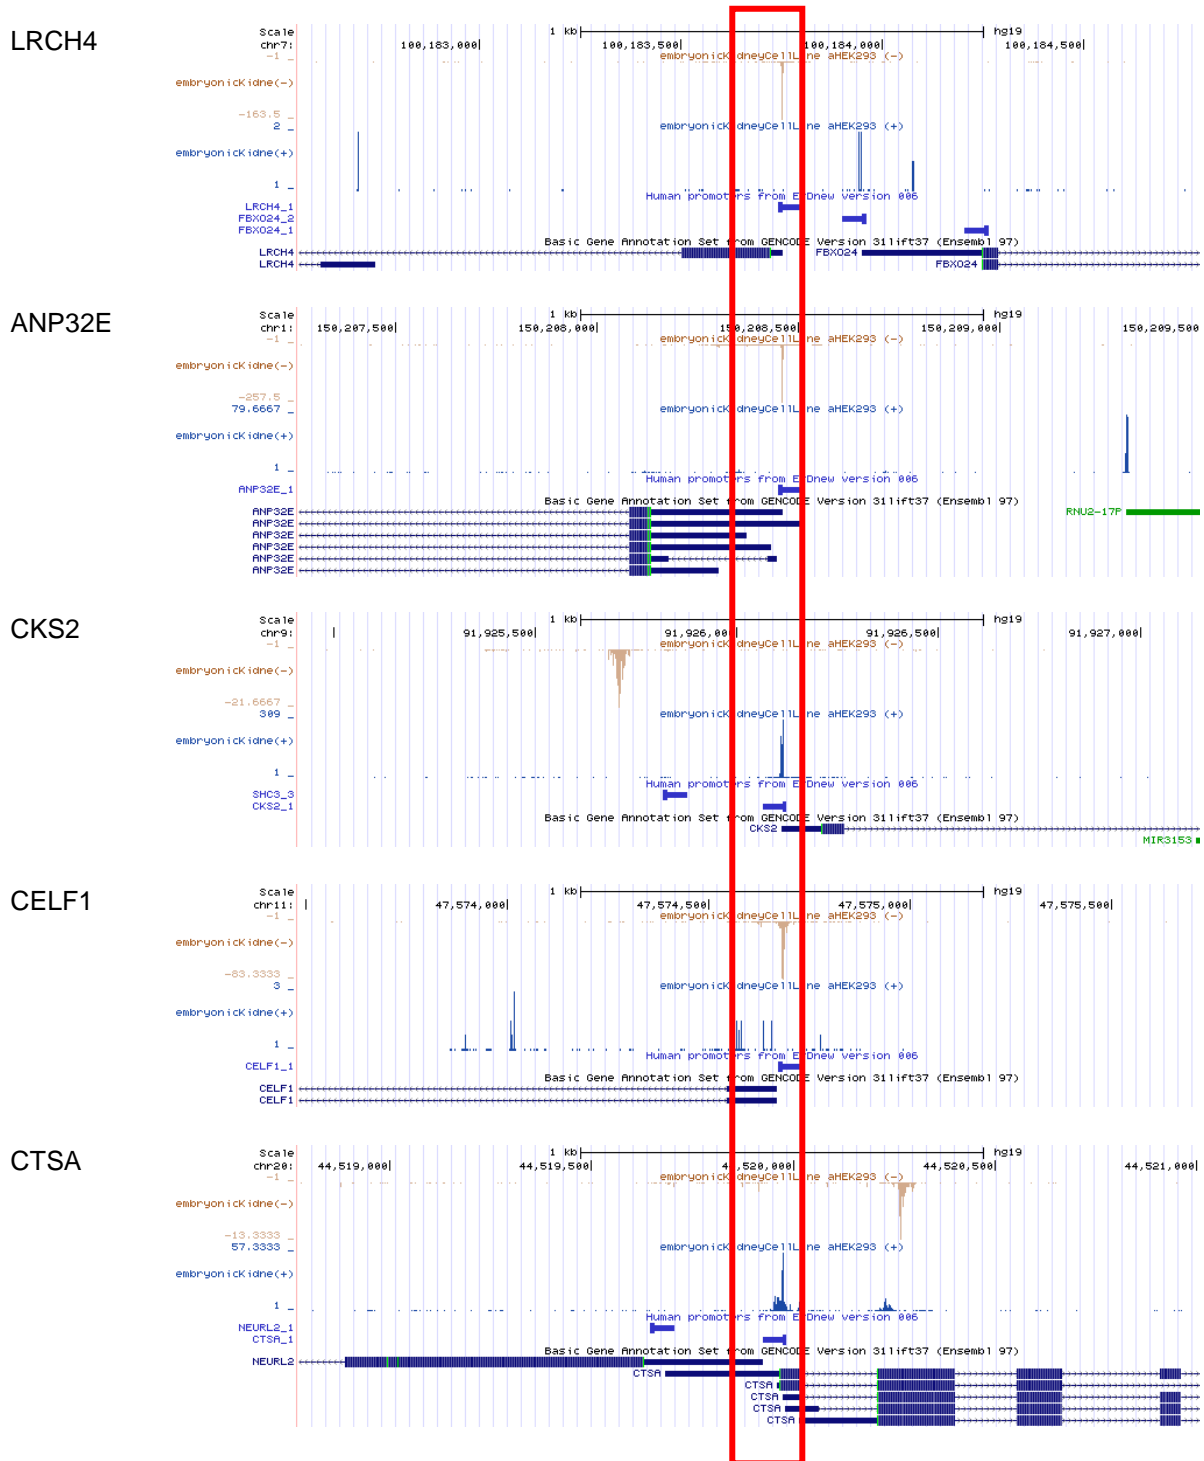

1038

1039

1040

1041

1042

1043

**S3 Fig. EPDnew screenshots of the analyzed promoters, used to define promoter shape.** FANTOM5-generated CAGE tags distribution of individual promoters in HEK-293 cells was manually examined using the EPDnew viewer, in order to determine their transcription initiation pattern.
